1 **IRE1 $\alpha$  regulates macrophage polarization, PD-L1 expression and tumor survival**

2 By

3 Alyssa Batista<sup>1\*</sup>, Jeffrey J. Rodvold<sup>1\*</sup>, Su Xian<sup>2</sup>, Stephen Searles<sup>1</sup>, Alyssa Lew<sup>1</sup>, Takao  
4 Iwawaki<sup>3</sup>, Gonzalo Almanza<sup>1</sup>, T. Cameron Waller<sup>2</sup>, Jonathan Lin<sup>4</sup>, Kristen Jepsen<sup>5</sup>, Hannah  
5 Carter<sup>2</sup>, and Maurizio Zanetti<sup>1</sup>

6  
7 <sup>1</sup> The Laboratory of Immunology  
8 Department of Medicine and Moores Cancer Center  
9 University of California, San Diego  
10 9500 Gilman Drive  
11 La Jolla, CA 92093-081  
12

13  
14 <sup>2</sup> Division of Medical Genetics; Department of Medicine,  
15 And Bioinformatics and Systems Biology Program  
16 University of California San Diego  
17 La Jolla, CA 92093  
18

19 <sup>3</sup> Laboratory for Cell Recovery Mechanisms  
20 Brain Science Institute  
21 RIKEN, 2-1 Hirosawa, Wako, Saitama 351-0198  
22 Japan.  
23

24 <sup>4</sup> Department of Pathology  
25 Stanford University  
26 300 Pasteur Drive  
27 Palo Alto, CA 94305  
28

29 <sup>5</sup> IGM Genomics Center  
30 University of California, San Diego  
31 9500 Gilman Drive  
32 La Jolla, CA 92093-0612.  
33

34  
35 \* These authors contributed equally

36  
37 Corresponding author: Maurizio Zanetti  
38  
39 Ph: (858) 822-5412  
40 FAX: (858) 822-5421  
41 Email: [mzanetti@ucsd.edu](mailto:mzanetti@ucsd.edu)  
42  
43

44 **ABSTRACT**

45 In the tumor microenvironment local immune dysregulation is driven in part by macrophages  
46 and dendritic cells that are polarized to a mixed proinflammatory/immune suppressive  
47 phenotype. The unfolded protein response (UPR) is emerging as the possible origin of these  
48 events. Here we report that the inositol-requiring enzyme 1 (IRE1 $\alpha$ ) branch of the UPR is  
49 directly involved in the polarization of macrophages *in vitro* and *in vivo*, including the  
50 upregulation of IL-6, IL-23, Arginase1, as well as surface expression of CD86 and PD-  
51 L1. Macrophages in which the IRE1 $\alpha$ /Xbp1 axis is blocked pharmacologically or deleted  
52 genetically have significantly reduced polarization, and CD86 and PD-L1 expression, which  
53 was induced independent of IFN $\gamma$  signaling suggesting a novel mechanism in PD-L1  
54 regulation in macrophages. Mice with IRE1 $\alpha$ - but not Xbp1-deficient macrophages showed  
55 greater survival than controls when implanted with B16.F10 melanoma cells. Remarkably,  
56 we found a significant association between the IRE1 $\alpha$  gene signature and *CD274* gene  
57 expression in tumor-infiltrating macrophages in humans. RNASeq analysis showed that bone  
58 marrow derived macrophages with IRE1 $\alpha$  deletion lose the integrity of the gene connectivity  
59 characteristic of regulated IRE1 $\alpha$ -dependent decay (RIDD) and the ability to activate *CD274*  
60 gene expression. Thus, the IRE1 $\alpha$ /Xbp1 axis drives the polarization of macrophages in the  
61 tumor microenvironment initiating a complex immune dysregulation leading to failure of  
62 local immune surveillance.

63

64

65

66

## 67 INTRODUCTION

68 Myeloid cells in the tumor microenvironment (TME) are of central relevance to understand  
69 the dynamics of tumor progression [1]. They infiltrate tumors in varying numbers depending  
70 on tumor types and display phenotypic and functional diversity [2, 3]. Among them  
71 macrophages and dendritic cells -cells privileged with antigen presentation/T cell activation  
72 functions- often acquire a mixed pro-inflammatory/immune suppressive (IIS) phenotype,  
73 both in the mouse [4, 5] and in humans [6, 7]. Because this phenomenon is considered at the  
74 root of the dysregulation of local adaptive T cell immunity [8, 9], much emphasis has been  
75 placed on identifying common mechanisms driving the acquisition of tumor-promoting  
76 properties by macrophages and dendritic cells in the TME [5, 10-14].

77 The TME is home to environmental *noxae* such as hypoxia and nutrient deprivation  
78 [15]. In addition, about 20% of tumors have a viral origin [16] and most (90%) solid tumors  
79 carry chromosomal abnormalities [17]. These events, independently or collectively, can lead  
80 to a dysregulation of protein synthesis, folding, and secretion [18, 19], and the accumulation  
81 of misfolded proteins within the endoplasmic reticulum (ER), triggering a stress response  
82 termed the unfolded protein response (UPR) [20]. The UPR, an evolutionarily-conserved  
83 adaptive mechanism [21], is mediated by three initiator/sensor ER transmembrane molecules:  
84 inositol-requiring enzyme 1 (IRE1 $\alpha$ ), PKR-like ER kinase (PERK), and activating  
85 transcription factor 6 (ATF6). In the unstressed state these three sensors are maintained  
86 inactive through association with the 78-kDa glucose-regulated protein (GRP78) [22]. During  
87 ER stress, GRP78 disassociates from each of the three sensors to preferentially bind  
88 un/misfolded proteins, activating each sensor and their downstream signaling cascades, which  
89 aim to normalize protein folding and secretion. PERK, a kinase, phosphorylates the  
90 translation initiation factor 2 (eIF2 $\alpha$ ) that effectively inhibits translation of most mRNAs,

91 ultimately reducing ER client proteins. IRE1 $\alpha$ , also a kinase, auto-phosphorylates and  
92 activates its RNase domain, resulting in the cleavage of the X-box binding protein 1 (XBP1)  
93 mRNA, yielding the production of the potent spliced XBP1 transcription factor isoform  
94 (XBP-1s), which drives the production of various ER chaperones to restore ER homeostasis.  
95 XBP-1s also binds to the promoter of several pro-inflammatory cytokine genes [23]. In  
96 addition, under ER stress or enforced autophosphorylation, IRE1 $\alpha$  RNase domain can initiate  
97 an endonucleolytic decay of many ER-localized mRNAs, a phenomenon termed regulated  
98 IRE1 $\alpha$ -dependent decay (RIDD) [24]. ATF6, a transcription factor, translocates to the Golgi  
99 where it is cleaved into its functional form, and acts in parallel with XBP-1s to restore ER  
100 homeostasis [25]. If ER stress persists despite these compensatory mechanisms, the  
101 transcription factor 4 (ATF4) downstream of eIF2 $\alpha$  activates the transcription factor  
102 CCAAT-enhancer-binding protein homologous protein (CHOP) to initiate apoptosis [20].

103         Although the UPR serves essentially as a cell-autonomous process to restore  
104 proteostasis, it can also act in a cell-nonautonomous way through the release of soluble  
105 molecules, a phenomenon likely to occur when cancer cells undergo an acute or unresolvable  
106 UPR [26, 27]. Stress signals emanating from the ER of ER stressed cancer cells may thus  
107 result in the induction of ER stress in neighboring cells, including macrophages and dendritic  
108 cells [26, 28]. This sets in motion a broad range of adaptive responses creating a functional  
109 cooperation or community effect among cells in the TME [29-31]. Under controlled  
110 experimental conditions bone marrow-derived macrophages and dendritic cells (BMDM and  
111 BMDC) cultured in conditioned media of ER stressed cancer cells develop a de novo UPR  
112 and acquire a mixed IIS phenotype [26, 28] characterized by the transcriptional upregulation  
113 of the tumorigenic pro-inflammatory cytokines IL-6, TNF $\alpha$ , and IL-23 [32-34], and  
114 contextually of the immune-suppressive enzyme Arginase 1 (Arg1) [35]. Under these

115 conditions, cross-priming of naïve CD8<sup>+</sup> T cells by BMDC is greatly compromised [28]. In  
116 line with this observation, Cubillos-Ruiz reported that the incubation of BMDC in ovarian  
117 cancer conditioned media results in *Xbp1* splicing, and that the conditional knock-out of  
118 *Xbp1* in dendritic cells improves antigen presentation and significantly reduces tumor growth  
119 *in vivo* [36]. In line with these observation is a report showing that GRP78 in cancer cells  
120 regulates macrophage recruitment to mammary tumors through metabolites secreted from  
121 cancer epithelial cells [37]. Thus, UPR-driven cell-nonautonomous mechanisms play a  
122 hitherto unappreciated role in orchestrating immune cells in the TME and driving their  
123 dysregulation, so as setting the stage for failure of local immune surveillance.

124 We therefore decided to elucidate the mechanism(s) through which the UPR may  
125 ultimately affect immune cells and perturb the TME to promote tumor growth. We focused  
126 on macrophages as these cells represent the major population infiltrating most solid tumors in  
127 humans, conspicuously more abundant than dendritic cells and other cells of myeloid origin  
128 [38]. Relative to dendritic cells or myeloid derived suppressor cells (MDSCs) [39, 40] little  
129 is known about how the UPR affects macrophages during cancer development. Based on our  
130 earlier report that BMDM can be polarized to a mixed IIS phenotype via a UPR-mediated  
131 cell-nonautonomous mechanism [26] our initial goal was to verify whether this phenomenon  
132 could be recapitulated in tumor-infiltrating macrophages *in vivo* in immunocompetent mice,  
133 and what UPR pathway might contribute to their dysregulation. To this day, these questions  
134 have remained largely unanswered. Here we show that the UPR and the IRE1 $\alpha$ /XBP1 axis  
135 are activated in macrophages during tumor growth, that the conditional knock-out of IRE1 $\alpha$   
136 in macrophages regulates the acquisition of a mixed IIS phenotype and is also sufficient to  
137 restrain tumor development *in vivo*. Importantly, we discovered that IRE1 $\alpha$  signaling  
138 regulates PD-L1 expression in murine and in tumor-infiltrating macrophages in humans.

## 139 RESULTS

### 140 Tumor infiltrating CD11b<sup>+</sup> myeloid cells display the UPR/IIS signature *in vivo*

141 Previous *in vitro* studies indicated that BMDC and BMDM respond to a cell-nonautonomous  
142 UPR developing a complex phenotype characterized by a UPR activation and a mixed pro-  
143 inflammatory/immune suppressive (IIS) phenotype [26, 28]. Here as an initial step we  
144 interrogated tumor-infiltrating myeloid cells (CD11b<sup>+</sup>) to document these characteristics  
145 during tumor growth *in vivo*. To this end, we implanted B16.F10 murine melanoma cells into  
146 C57BL/6 mice that carry the *Xbp1-Venus* fusion transgene under the control of the CMV- $\beta$   
147 actin promoter, known as the ER stress-activated indicator (ERAI) [41], which reports IRE1 $\alpha$   
148 mediated *XBPI* splicing through the expression of the fluorescent Venus protein. First, we  
149 interrogated the relative abundance of CD11b<sup>+</sup> cell infiltrate into tumors three weeks after  
150 implantation of B16.F10 tumor cells and found that 2-5 % of the bulk tumor consisted of  
151 CD11b<sup>+</sup> myeloid cells (Fig. S1). Of these ~50% expressed the F4/80 surface marker specific  
152 of macrophages. We then compared the expression of the *Venus* protein in tumor-infiltrating  
153 CD11b<sup>+</sup> cells to those in the spleen and bone marrow, both from tumor-distal and tumor-  
154 proximal femurs (Fig 1A). The *Venus* protein signal was significantly higher in tumor-  
155 infiltrating CD11b<sup>+</sup> cells relative to those in control tissues, suggesting a concurrent UPR  
156 signaling with *XBPI* splicing in the TME only.

157 Having established that *XBPI* splicing occurs in tumor-infiltrating CD11b<sup>+</sup> cells, we  
158 sought to detect other features of the IIS phenotype. To this end, we implanted B16.F10 cells  
159 in wild-type C57BL/6 mice and isolated by positive selection CD11b<sup>+</sup> cells from tumor,  
160 spleen and bone marrow 22 days post-implantation. Phenotypically, the isolated cells were  
161 CD11b<sup>+</sup> and Gr1<sup>-</sup> and showed the transcriptional upregulation of three key UPR genes:  
162 *Grp78*, a downstream target of the ATF6 pathway, spliced *Xbp1* (*Xbp1-s*) a downstream

163 product of the IRE1 $\alpha$  pathway, and *Chop*, a downstream product of the PERK pathway (Fig.  
164 1B). A transcriptional upregulation of all three genes suggested the activation of a classical  
165 UPR. Contextually, CD11b<sup>+</sup> cells also showed the transcriptional upregulation of *Il23p19*, a  
166 key pro-inflammatory cytokine gene, and Arginase-1 (*Arg1*), an immune suppressive enzyme  
167 (Fig. 1C).

168 To see if the UPR/IIS signature also hallmarks CD11b<sup>+</sup> cells during spontaneous  
169 tumor growth, we interrogated mice with mutations in the adenomatous polyposis coli (*Apc*)  
170 gene (“Apc mice”), which develop small intestinal adenomas by 30 days of age [42]. We  
171 pooled CD11b<sup>+</sup> cell infiltrates from adenomas from multiple Apc mice and probed the  
172 expression of UPR genes, *Il-23p19* and *Arg1* relative to CD11b<sup>+</sup> cells isolated from either the  
173 bone marrow or the spleen as controls. CD11b<sup>+</sup> cells from APC adenomas had increased  
174 expression of UPR genes, *Il-23p19* and *Arg1* (Fig. 1D,E). Collectively, these data suggest  
175 that CD11b<sup>+</sup> cells infiltrating the TME undergo ER stress and are polarized to the IIS  
176 phenotype.

### 177 **IRE1 $\alpha$ dependent cell-nonautonomous polarization of macrophages**

178 Environmental conditions shown to have tumor promoting effects have been linked to both  
179 IRE1 $\alpha$  and PERK, making it necessary to determine which of the two was responsible for the  
180 acquisition of the IIS phenotype in our model system. To probe the role of IRE1 $\alpha$ , we used  
181 the small molecule 4 $\mu$ 8C, an inhibitor specific for the RNase domain. This small molecule  
182 forms an unusually unstable Schiff base at lysine 907 (K907) and inhibits both XBP1 splicing  
183 and regulated IRE1 $\alpha$ -dependent decay (RIDD), but not IRE1 $\alpha$  kinase activity. To confirm  
184 that 4 $\mu$ 8c (30  $\mu$ M) was effective we measured *Xbp-1* splicing in C57Bl/6 BMDM and  
185 B16.F10 cells treated with the conditioned medium (CM) of ER stressed cancer cells  
186 (transmissible ER stress conditioned medium or “TERS CM”) (Fig. S2). Compared to

187 uninhibited conditions, 4 $\mu$ 8C did not significantly affect the transcriptional of UPR genes  
188 (*Grp78* and *Chop*, Fig. 2A). However, it significantly inhibited the transcriptional activation  
189 of *Il-6* and *Il-23p19* (Fig. 2B) and trended towards inhibiting *Arg1* (p=0.127) (Fig. 2C).  
190 Previously, we showed that TERS CM promotes the expression of CD86 and PD-L1 in  
191 BMDC [28]. Herein, we determined that ERAI BMDM treated with TERS CM also  
192 upregulate CD86 and PD-L, and that such an upregulation that is markedly inhibited by 4 $\mu$ 8C  
193 (Fig. 2D).

194 The involvement of the PERK pathway on the acquisition of the IIS phenotype by  
195 BMDM was assessed using the small molecule GSK2656157, a preferential PERK inhibitor  
196 [43]. GSK2656157 efficiently inhibited PERK phosphorylation (Fig S3A) but had no effect  
197 on the upregulation of *Grp78*, *Il-6* and *Arg1* induced in BMDM cultures by TERS CM (Fig.  
198 S3B). Congruently, PERK inhibition had little to no effect on the surface expression of CD86  
199 and PD-L1 (Fig S3C). Collectively, these results suggest that BMDM polarization to the IIS  
200 phenotype is IRE1 $\alpha$  dependent. -

201 The role of IRE1 $\alpha$  during macrophage activation by stimuli not obviously related to  
202 the UPR was tested in experiments in which BMDM were activated by LPS, a canonical  
203 activator of macrophages, or two metabolites shown to be relevant to the function of myeloid  
204 cells in the tumor microenvironment: lactic acid [10] and 4-hydroxynonenal (4-HNE), a  
205 products of lipid peroxidation [36]. While none of these molecules induced the transcriptional  
206 activation of *Gr78*, LPS consistently and readily induced *Il23p19* and *Il6* independent of  
207 IRE1 $\alpha$ . Lactic acid induced *Arg1* only, and 4HNE had no effect on any of the target genes  
208 studied. Interestingly, 4 $\mu$ 8C reduced the induction of *Arg1* by both LPS and lactic acid,  
209 suggesting that the IRE1 $\alpha$  may regulate the expression of this immune suppressive molecule  
210 outside the context of the UPR (Fig. S4).



211 **Loss of IRE1 $\alpha$ -Xbp1 in macrophages attenuates the IIS phenotype, PD-L1 expression**  
212 **and tumor growth *in vivo***

213 Earlier reports showed that XBP1 is required for the development and survival of bone  
214 marrow derived DC [44], and that the deletion of XBP1 in lymphoid DC [40, 45] or in tumor-  
215 associated DC [36] improves antigen cross-priming and reduces tumor (ovarian) growth in  
216 the mouse. The role of the IRE1 $\alpha$ /XBP1 axis in macrophage activation in the context of  
217 tumorigenesis has not been previously explored. Chemical inhibition of IRE1 $\alpha$  endonuclease  
218 activity clearly implicated the IRE1 $\alpha$  pathway in macrophage polarization to the IIS  
219 phenotype. However, since 4 $\mu$ 8C inhibits both *Xbp1* splicing and RIDD activity [46], we  
220 used a genetic approach to distinguish mechanistically among the two IRE1 $\alpha$  functions in the  
221 acquisition of the IIS phenotype. To this end, we developed mice with *Ern1* (the gene coding  
222 for IRE1 $\alpha$ ) or *Xbp1* conditional knockout (CKO) in macrophages by breeding mice floxed  
223 (*fl/fl*) for *Ern1* [41] or *Xbp1* [47] with LysM-Cre mice (B6.129P2-Lys2tm1(cre)Ifo/J [48]).  
224 The genotype of CKO mice is shown in Fig. S5. Western blot analysis of *Ern1* CKO BMDM  
225 confirmed the absence of IRE1 $\alpha$  (Fig. 3A) as well as the absence of the spliced form of *Xbp1*  
226 following treatment with the SERCA (sarco/endoplasmic reticulum Ca<sup>2+</sup>-ATPase) inhibitor  
227 thapsigargin (Fig. 3B). Under similar experimental conditions, *Xbp1* CKO BMDM showed  
228 an intact IRE1 $\alpha$  expression under basal conditions (Fig. 3A) but the absence of the spliced  
229 form of *Xbp1* after thapsigargin treatment (Fig. 3C). Thus, the LysM-Cre CKO system was  
230 effective at specifically deleting IRE1 $\alpha$  and *Xbp1* in activated BMDM.

231 First we compared the transcriptional response of *Ern1* and *Xbp1* CKO vs wild type  
232 BMDM when treated with TERS CM. We found that *Grp78* and *Chop* were unaffected in  
233 *Ern1* CKO BMDM, but *Il6*, *Il-23p19* and *Arg1* were markedly and significantly reduced in  
234 CKO relative to *fl/fl* control BMDM (Fig. 3D, upper panels). Likewise, in *Xbp1* CKO

235 BMDM, the induction of *Grp78* and *Chop* was unaffected, but the activation of *Il6* and  
236 *Il23p19* was significantly reduced compared to *fl/fl* control BMDM. The activation of *Arg1*  
237 trended lower in *Xbp1* CKO compared to *fl/fl* control BMDM ( $p = 0.0571$ ). (Fig. 3D, lower  
238 panels). These results confirm that the IRE1 $\alpha$ -XBP1 axis mediates the IIS phenotype.

239 We then evaluated the effect of TERS CM on the expression of CD86 and PD-L1 in  
240 BMDM populations. *In vitro* treatment of *Ern1* or *Xbp1* CKO BMDM with TERS CM  
241 yielded a significant reduction of both surface proteins compared to wild type BMDM (Fig.  
242 3E). Thus, the conditional deletion of the IRE1 $\alpha$ /XBP1 axis in macrophages produced effects  
243 consistent with the pharmacological inhibition by 4 $\mu$ 8C. This suggests that the IRE1 $\alpha$ -XBP1  
244 axis is central to both macrophage activation (CD86 upregulation) and the acquisition of PD-  
245 L1, a marker of immune dysfunction. We ruled out the possibility that PD-L1 expression was  
246 the result of canonical IFN- $\gamma$  signaling since (a) we did not detect IFN- $\gamma$  in TERS CM (Fig.  
247 S6A), (b) a blocking antibody to human IFN- $\gamma$  had no effect on *Cd274* gene expression in  
248 BMDM treated with TERS CM (Fig. S6B), and (c) RNASeq data showed no induction of the  
249 *Ifng* gene in either *Ern1* CKO or *fl/fl* control BMDM treated with TERS CM (Fig. S6C).

250 To ascertain the physiological relevance of these findings, we next assessed the  
251 survival of *Ern1* and *Xbp1* CKO mice implanted with B16.F10 melanoma cells. We reasoned  
252 that survival would constitute an optimal initial read-out for the complex interactions between  
253 cancer cells and immune cells in the TME with focus on the IRE1 $\alpha$ -XBP1 axis in myeloid  
254 cells. Survival in *Ern1* CKO mice was significantly greater ( $p=0.03$ ) than in control *Ern1 fl/fl*  
255 mice (Fig. 4A). By contrast, *Xbp1* CKO mice survived longer than control *Xbp1 fl/fl* mice but  
256 the difference was non-significant (Fig. 4A). Based on survival data we isolated F4/80  
257 tumor-infiltrating macrophages of tumor-bearing *Ern1* CKO mice to assess the UPR/IIS and  
258 *Cd274* gene expression status. *Xbp1s*, *Il-23p19*, *Arg1* and *Cd274* genes were all markedly

259 reduced in *Ern1* CKO macrophages compared to their *Ern1 fl/fl* counterpart (Fig. 4B).

260 Together, these results point to macrophage IRE1 $\alpha$  as a key negative regulator of TME

261 immunodynamics and tumor growth *in vivo*.

### 262 **Loss of RIDD regulation in *Ern1* CKO macrophages**

263 Because the IRE1 $\alpha$ -XBP1 axis also regulates PD-L1 expression and both *Ern1* and *Xbp1*

264 CKO BMDM showed significantly-reduced surface PD-L1 protein expression compared to

265 *fl/fl* BMDM (Fig. 3E), we decided to distinguish the relative contribution of *Xbp1* splicing

266 and RIDD to this phenomenon. To this end, we performed RT-qPCR on *Ern1*- and *Xbp1*

267 CKO BMDM treated or not with TERS CM relative to *fl/fl* controls. We found that *Cd274*

268 gene transcription was markedly and significantly lower in *Ern1* CKO BMDM relative to *fl/fl*

269 controls (Fig. 5A). By contrast, *Xbp1* CKO BMDM and *fl/fl* BMDM had comparable *Cd274*

270 gene transcription values (Fig. 5A). Based on this result and on PD-L1 surface expression

271 (Fig. 3E), we tentatively conclude that XBP1-mediated regulation of PD-L1 occurs at the

272 post-translation level, whereas IRE1 $\alpha$ -mediated regulation is a transcriptional event. This

273 conclusion favors the view that IRE1 $\alpha$ -mediated PD-L1 regulation may occur via RIDD,

274 justifying an in-depth analysis of RIDD activity in *Ern1* CKO BMDM.

275 We performed RNASeq analysis of *fl/fl* and *Ern1* CKO BMDM untreated or treated

276 with TERS CM. Three independently-derived BMDM populations per group were analyzed.

277 The genotype of each mouse used in this experiment is shown in Fig. S5. Upon TERS CM

278 treatment *Ern1* expression in *Ern1* CKO macrophages was 1.79-fold over that of untreated

279 cells compared to 3.26 fold in *fl/fl* macrophages (Fig. 5B). We found that consistent with the

280 flow cytometry data, *Cd274* (PD-L1) expression was markedly increased in macrophages

281 (44.45-fold) but only moderately increased in *Ern1* CKO macrophages (4.11-fold, Fig 5C).

282 Thus, both genetic and chemical inhibition of IRE1 $\alpha$  signaling yielded concordant results.

283           Next, we performed a comprehensive analysis of RIDD activity using a set of 33  
284 putative RIDD target genes previously defined [49]. We found that only half (sixteen) of  
285 these genes behaved as *bona fide* RIDD targets in TERS CM-treated BMDM (i.e., decreased  
286 expression after TERS CM treatment in *fl/fl* macrophages) (Fig. 5D, upper panel). We found  
287 that in *Ern1* CKO macrophages, there was a clear loss of a “RIDD signature” compared to  
288 *fl/fl* macrophages, both basally and after TERS CM treatment (Fig. 5D, lower panel). When  
289 considered together through an analysis of the mean z-score for the 16 genes, it became  
290 apparent that TERS CM induction of RIDD activity was much more effective in *fl/fl* than in  
291 *Ern1* CKO macrophages (Fig. 5E). Collectively, these results show that macrophages  
292 lacking *Ern1* lose RIDD regulation, suggesting that RIDD may be implicated in the  
293 regulation of PD-L1 expression.

294           In the same analysis we found that *Tapbp* (tapasin), a chaperone molecule involved in  
295 the stabilization of high affinity peptide/MHC-I complexes in the endoplasmic reticulum  
296 [50], did not behave as RIDD. In fact, *fl/fl* macrophages treated with TERS CM showed  
297 *increased* not diminished expression at variance with previous reports on lymphoid (CD8 $\alpha^+$ )  
298 dendritic cells [40, 45]. The expression of *Bloc1s1* (a canonical RIDD target) was reduced,  
299 confirming that TERS CM induces RIDD (Fig. S7A). RT-qPCR analysis of *Tapbp* in *Xbp1*  
300 *fl/fl* macrophages showed similar results (Fig. S7B). Perhaps, *Tapbp* is regulated by RIDD  
301 differently in CD8 $\alpha^+$  dendritic cells and in BMDM.

### 302 **A link between IRE1 $\alpha$ and PD-L1 expression in human tumor-infiltrating macrophages**

303           The data reported herein suggest that *Cd274* gene expression in murine macrophages is  
304 positively regulated by IRE1 $\alpha$ . Recently, Xu et al. [51] reported that PD-L1 protein  
305 expression in murine MYC<sup>tg</sup>:KRAS<sup>G12D</sup> tumor cells is decreased by a small molecule that  
306 enables the cell to resume translation while the eIF2 $\alpha$  downstream from PERK remains

307 phosphorylated. Therefore, we decided to study the relationship between *CD274* (PD-L1)  
308 gene expression and the two major UPR pathways, IRE1 $\alpha$  and PERK, across multiple human  
309 cancers. We began by interrogating the relative contribution of *ERN1* (IRE1 $\alpha$ ) and *EIF2AK3*  
310 (PERK) to *CD274* gene expression. In this analysis, we queried The Cancer Genome Atlas  
311 (TCGA) collection of RNA-sequencing expression data for bulk samples from thirty-one  
312 tumor types. Across these data, we observed that *ERN1* correlates strongly with *EIF2AK3*  
313 (Pearson correlation coefficient = 0.55;  $p < 1e-200$ ) (Fig. S8A), and that both *ERN1* ( $p \leq$   
314  $1.46e-51$ ) and *EIF2AK3* ( $p \leq 1.62e-44$ ) correlate positively with *CD274*, suggesting that the  
315 UPR plays a role in *CD274* gene expression. These correlations prompted us to further  
316 interrogate the relationship between *CD274*, *ERN1* and *EIF2AK3*, with respect to levels of  
317 infiltrating macrophages in bulk tumor samples approximated by a macrophage score derived  
318 from the geometric mean of three genes expressed by macrophages (*CD11b*, *CD68*, and  
319 *CD163*). We found a positive correlation between *ERN1* and *CD274* within the high  
320 macrophage infiltration group ( $> 70$ th percentile) (Spearman correlation coefficient 0.18;  $p$   
321  $< 1.3e-21$ ) (Fig. S8B). By contrast, the low macrophage infiltration group ( $< 30$ th percentile)  
322 had a much weaker correlation (Spearman correlation coefficient 0.06;  $p < 0.001$ ) (Fig.  
323 S8B). On the other hand, *EIF2AK3* and *CD274* within the high macrophage infiltration group  
324 ( $> 70$ th percentile) had a lower correlation (Spearman correlation coefficient 0.09;  $p < 1.9e-$   
325  $7$ ) than in the corresponding *Ern1* group (Fig. S8C). Finally, *EIF2AK3* and *CD274* within the  
326 low macrophage infiltration group ( $< 30$ th percentile) had a surprisingly higher correlation  
327 (Spearman correlation coefficient 0.15;  $p < 8.32e-15$ ) than in the respective high macrophage  
328 infiltration group (Fig. S8C). Collectively, this analysis suggests that when macrophage  
329 infiltration is high, *Ern1* is a better predictor of *CD274* gene expression than *EIF2AK3*.

330 We also integrated the macrophage score with *ERN1* and *EIF2AK3* to predict *CD274*  
331 expression in an ordinary least squares (OLS) linear regression model, including the tumor

332 type as a covariate (Table 1). We found that this model assigns significant, positive  
333 coefficients for the interaction terms of macrophages with *ERN1* (*ERN1*\*Macrophages, beta  
334 coefficient = 0.0012,  $p < 0.023$ ) but not *EIF2AK3* (*EIF2AK3*\*Macrophages, beta coefficient  
335 = 0.0007,  $p < 0.155$ ), suggesting that *ERN1* but not *EIF2AK3* is predictive of *CD274* gene  
336 expression within tumor-infiltrating macrophages in individual tumor types (Table 1). To  
337 validate these results we analyzed RNA-Seq data generated from macrophages isolated from  
338 thirteen patients with either endometrial or breast cancer [52]. We found a strong Pearson  
339 correlation coefficient between *ERN1* and *EIF2AK3* in these data (correlation coefficient  
340 0.738;  $p < 0.003$ ), suggesting UPR activation. Since IRE1 $\alpha$  activity is a multistep and  
341 complex process [53] and may not be completely captured by *ERN1* expression levels, we  
342 derived a systemic representation of pathway activity controlled by IRE1 $\alpha$  and by  
343 comparison PERK. We collected sets of downstream genes in the IRE1 $\alpha$  and PERK  
344 pathways [54], and derived aggregate scores for each pathway from the mean expression  
345 signal of all detectable genes after z-score transformation. Since the transformed pathway  
346 scores could potentially amplify noise from genes with low expression, we applied filters to  
347 include only genes in each pathway with levels beyond a specific threshold (Fig. S9). We  
348 varied this filter threshold from zero to one thousand raw counts and then included the  
349 pathway activity scores in multiple OLS linear models to predict *CD274* across tumor-  
350 infiltrating macrophage samples (Fig. 6A). We found that a filter threshold of 100 counts  
351 effectively reduced noise while preserving signal from 84% of detectable genes in both the  
352 IRE1 $\alpha$  and PERK pathways. In this model, the IRE1 $\alpha$  score predicted *CD274* expression  
353 with a significant positive beta coefficient (beta coefficient = 21.043, p-value = 0.040), while  
354 the PERK score was non-significant (beta coefficient = 36.842, p-value = 0.103). This  
355 pattern of significant IRE1 $\alpha$  coefficient and nonsignificant PERK coefficient was consistent  
356 across all filter thresholds (Fig. 6B). Comparing models wherein *CD274* expression was

357 explained by IRE1 $\alpha$  activity alone or by both IRE1 $\alpha$  and PERK activity using the Aikake  
358 information criterion analysis shows that a model containing both is as 0.54 times as probable  
359 as the IRE1 $\alpha$  alone to minimize the information loss ( $\Delta$ AIC = 1.23). Taken together, these  
360 analyses suggest that the activation of *CD274* gene expression in tumor-infiltrating  
361 macrophages depends primarily on the IRE1 $\alpha$  pathway.

362

## 363 **DISCUSSION**

364 Here we analyzed the effect of the UPR on gene expression regulation in macrophages as a  
365 potential mechanism driving immune dysregulation in the tumor microenvironment. Tumor-  
366 infiltrating CD11b<sup>+</sup> myeloid cells in B16.F10 tumors and in spontaneously-arising colonic  
367 adenomas in *Apc* mice have an active UPR and display a mixed pro-inflammatory/immune  
368 suppressive phenotype. Using both a pharmacologic and genetic approach we show that the  
369 IRE1 $\alpha$ /XBP1 axis plays a central role in macrophage activation and polarization to a mixed  
370 phenotype, including the upregulation of PD-L1. In agreement with the mouse data we found  
371 that in human tumor-infiltrating macrophages *CD274* (PD-L1) gene transcription correlates  
372 significantly with the IRE1 $\alpha$  gene signature. B16.F10 tumor-bearing mice with conditional  
373 *Ern1*- but not *Xbp1* KO macrophages had significantly greater survival than their *fl/fl*  
374 controls. Collectively, these results show that IRE1 $\alpha$  signaling drives macrophage  
375 dysregulation impacting negatively the immunobiology of the tumor microenvironment and  
376 ultimately the host's ability to control tumor growth.

377 Virtually all adult solid tumors (carcinomas most notably) contain infiltrates of  
378 diverse leukocyte subsets, including macrophages, dendritic cells, and lymphocytes [2].  
379 CIBERSORT and immunohistochemical tools have previously shown that macrophages

380 represent the largest fraction among infiltrating leukocytes and their density correlates  
381 directly with poor survival [38, 55]. In the mouse, tumor-infiltrating CD11b<sup>+</sup> myeloid cells  
382 produce pro-inflammatory/pro-tumorigenic cytokines (IL-6, IL-23, TNF $\alpha$ ) [32-34], but  
383 oddly, also anti-inflammatory cytokines (IL-10, TGF $\beta$ ) and molecules with immune  
384 suppressive function (Arginase1, perioxinitrite and indoleamine 2-3 dioxygenase) [8]. In  
385 humans, monocytes/macrophages with a “mixed” pro-inflammatory/suppressive phenotype  
386 have been reported in patients with renal cell carcinoma [6] and breast cancer [7]. Thus, a  
387 dysregulation-prone TME harbors CD11b<sup>+</sup> myeloid cells with a split pro-  
388 inflammatory/immune suppressive phenotype that may be the result of hijacking by tumors  
389 for their own benefit [56]. Indeed, we previously proposed that tumor-derived UPR-driven  
390 factors determine the IIS phenotype in myeloid cells [57], contributing to progressive  
391 immune dysregulation and failure of immune surveillance.

392         Here, we analyzed two murine tumor models to demonstrate that tumor-infiltrating  
393 CD11b<sup>+</sup> cells display features of UPR activation and a mixed IIS phenotype. The results  
394 clearly show that the UPR is associated with myeloid cell polarization *in vivo*, but do not  
395 allow a distinction between a cell-autonomous and a cell non-autonomous mechanism.  
396 However, since common triggers of inflammation such as LPS, or TME metabolites such as  
397 4HNE and lactic acid [10, 36], did not induce a UPR/IIS phenotype, we favor the possibility  
398 that these changes in myeloid cells result from a cell non-autonomous mechanism of  
399 intercellular communication consistent with findings on BMDM and BMDC analyzed under  
400 controlled *in vitro* conditions [26, 28]. This appears to be a general mechanism since we  
401 recently showed that cell-nonautonomous intercellular communication among cancer cells  
402 induces an adaptive UPR imparting receiver cells with enhanced cellular fitness and  
403 resistance to various stressors [27].



404 A pharmacological approach using a small molecule (4 $\mu$ 8c) that inhibits IRE1 $\alpha$   
405 significantly reduced the transcription of *Il-6* and *Il-23p19* induced by TERS CM  
406 demonstrating a direct involvement of the IRE1 $\alpha$ /XBP1 axis in driving pro-inflammation  
407 during an adaptive UPR. This is consistent with previous reports showing that XBP1 is  
408 recruited to the *Il6* and *Il23* promoters [23] and that *Il23* transcription is IRE1 $\alpha$ -dependent  
409 [58]. Interestingly, 4 $\mu$ 8C did not reduce the transcription of these cytokines in the absence of  
410 a UPR, implying that IRE1 $\alpha$  selectively regulates pro-inflammation within the boundaries of  
411 the UPR. Our findings on macrophage polarization via cell-nonautonomous means are  
412 consistent with reports showing that IRE1 $\alpha$  drives M1 to M2 polarization of macrophages  
413 within white adipose tissue [59] and their inflammatory response to saturated fatty acids [60].  
414 Importantly, 4 $\mu$ 8C also inhibited the TERS CM-induced upregulation of *Arg1*, and that of  
415 pro-angiogenic vascular endothelial growth factor (VEGF) (Fig. S10). Since IL-6 and IL-23  
416 are known to bias T cell differentiation towards inflammatory (Th17) or regulatory T cells  
417 [61-65], and *Arg1* potently suppresses the clonal expansion of T cells activated by antigen  
418 [28, 35], it follows that signaling through the IRE1 $\alpha$ /XBP1 axis is of paramount importance  
419 to the economy of the TME and may be at the origin of a loss of local immune surveillance.

420 *Ern1* or *Xbp1* CKO macrophages enabled us to distinguish different roles within the  
421 IRE1 $\alpha$ /XBP1 axis relative to immune dysregulation and tumor growth. *In vitro*, both *Ern1*-  
422 and *Xbp1*-CKO BMDM had decreased activation (CD86 and PD-L1 surface expression) and  
423 an attenuated IIS phenotype compared to control *fl/fl* macrophages when cultured in TERS  
424 CM, consistent with the effects of 4 $\mu$ 8C. However, only IRE1 $\alpha$  deficiency significantly  
425 increased survival of mice implanted with B16.F10 melanoma cells, a result possibly  
426 reflected by an attenuation of the UPR/IIS signature and PD-L1 in tumor-infiltrating  
427 macrophages. Cubillos-Ruiz [36] also observed that IRE1 $\alpha$  deficiency in DCs yielded

428 greater survival than XBP1 deficiency in a model of ovarian cancer. By inference, we  
429 showed that B16.F10 tumor cells admixed with bone marrow-derived DCs with a UPR/IIS  
430 phenotype form faster-growing and larger tumors that had a marked reduction in tumor-  
431 infiltrating CD8<sup>+</sup> T cells [28].

432 Chemical and genetic inhibition both showed that IRE1 $\alpha$  regulates the surface  
433 expression of PD-L1 triggered in an IFN $\gamma$ -independent manner through an adaptive UPR.  
434 PD-L1 activation is considered to occur mainly in response to IFN $\gamma$ , albeit other mechanisms  
435 can contribute to its activation both at the transcriptional and post-translational levels [66].  
436 The inhibition of cell surface PD-L1 upregulation during the UPR by either pharmacological  
437 or genetic means indicates that the IRE1 $\alpha$ /XBP1 axis functions as a gatekeeper of PD-L1  
438 expression in macrophages independently of IFN $\gamma$  produced locally by T cells. By comparing  
439 gene expression in *Ern1*- and *Xbp1*-CKO macrophages it became apparent that *Ern1* but not  
440 *Xbp1* regulates a UPR-mediated PD-L1 gene expression.

441 Mouse studies showed that the sensitivity to PD-L1 blockade depends on PD-L1  
442 expression in myeloid cells (macrophages and dendritic cells) and not on tumor cells [67,  
443 68]. Remarkably, a recent report showed that ISRIB, a small molecule that reverses the  
444 effects of eIF2 $\alpha$  phosphorylation downstream of PERK, reduces the abundance of the PD-L1  
445 protein in murine *MYC<sup>Tg</sup>;KRAS<sup>G12D</sup>* liver cancer cells [51]. Whereas both reports agree on  
446 the role of the UPR in regulating PD-L1 expression, the discrepancy between the two studies  
447 creates an interesting conundrum as to why PD-L1 might be under the control of two  
448 different arms of the UPR in myeloid and tumor cells, respectively. Significantly, our  
449 analysis of tumor-infiltrating macrophages isolated from human endometrial and breast  
450 cancers indicates that the IRE1 $\alpha$  gene signature is a better predictor of *CD274* (PD-L1)  
451 transcription than the PERK gene signature, confirming the conclusion reached in mouse

452 macrophages, pointing to IRE1 $\alpha$  as an important IFN $\gamma$ -independent regulator of *CD274* in  
453 macrophages. Since PD-L1 serves as the ligand for PD-1<sup>+</sup> T cells with exhausted [69] or  
454 regulatory phenotype [70], a plausible conclusion from the present study is that IRE1 $\alpha$   
455 inhibition in tumor-infiltrating myeloid cells could be used therapeutically to ameliorate the  
456 effects of immune dysregulation in the TME, including the downregulation of PD-L1,  
457 ultimately rescuing a failing immune surveillance and restoring immune competence  
458 locally.

459 A RIDD analysis in *Ern1* deficient macrophages showed a dramatic loss of the  
460 integrity and connectivity of RIDD genes compared to control (*Ern1 fl/fl*) macrophages. This  
461 provides initial mechanistic evidence that RIDD may be involved in shaping the immune  
462 landscape in the TME, including PD-L1 expression. A possibility is that upon IRE1 $\alpha$   
463 activation, RIDD degrades not only mRNAs but miRNAs as well, among which is miR-34a  
464 [71, 72], a miRNA also shown to target *CD274* (PD-L1) mRNA by directly binding to its 3'-  
465 UTR [73, 74]. The loss of RIDD integrity shown here suggests that RIDD / miR-34a could  
466 represent the link between IRE1 $\alpha$  and *CD274* gene expression. Future studies will need to  
467 address the role of RIDD in PD-L1-driven immune dysregulation in the TME.

468 In conclusion, we provide evidence in support of UPR-driven mechanisms as a source  
469 of immune dysregulation in the tumor microenvironment. We have identified the  
470 IRE1 $\alpha$ /XBP1 axis as a critical signaling pathway in macrophage polarization to a mixed pro-  
471 inflammatory/immune suppressive phenotype, PD-L1 expression and tumor growth. Cell-  
472 nonautonomous IRE1 $\alpha$ -dependent signaling has been proposed as a regulator of immune  
473 activation [75] and stress resistance and longevity in *C. elegans* [76], suggesting that the  
474 IRE1 $\alpha$ /XBP1 axis may be central to intercellular communication during cellular stress. Here  
475 we further validate the view that UPR signals in the TME directly affect tumor-infiltrating

476 macrophages promoting a complex immune dysregulation and defective tumor control *in*  
477 *vivo*. The fact that the IRE1 $\alpha$ /XBP1 axis also regulate PD-L1 expression point to the UPR as  
478 a general mechanism for immune dysregulation at the tumor and immune cells interface  
479 with myeloid cells ultimately impairing the function of tumor specific T cells [28, 36] with  
480 loss of local immune surveillance.  
481

## 482 MATERIALS AND METHODS

### 483 Cell lines and cell culture

484 Human cells lines colon carcinoma DLD1 and prostate PC3 and murine cell lines prostate  
485 TC1 and melanoma B16.F10 cancer cells were grown in RPMI or DMEM (Corning)  
486 supplemented with 10% FBS (HyClone) and 1% penicillin/streptomycin/L- glutamine,  
487 NEAA, sodium pyruvate, HEPES. All cells were maintained at 37°C incubation with 5% O<sub>2</sub>.  
488 All cell lines were mycoplasma free as determined PCR assay (Southern Biotech).

### 489 Mice

490 APC mice were provided as a kind gift from Dr. Eyal Raz (UCSD). LysM. B6.129P2-Lyz2  
491 <sup>tm1(cre)lfo</sup>/J (LysM-Cre) mice were kindly provided by Dr. Richard Gallo (UCSD). ERN1<sup>fl/fl</sup>  
492 and XBP1<sup>fl/fl</sup> mice were kindly provided by Dr. Jonathan Lin (UCSD) who originally  
493 obtained them from Drs. Laurie Glimcher (Dana Farber, Harvard University) and Takao  
494 Iwawaki (RIKEN, Japan). All mice were housed in the UCSD vivarium according to  
495 approved protocols and animal welfare standards. Genotype of CKO mice were confirmed by  
496 PCR on tissue obtained by ear punch and digested according to a standard protocol.

### 497 TERS Conditioned Medium (CM) Generation

498 DLD1 cells were induced to undergo ER stress through treatment of 300 nM thapsigargin  
499 (Tg) (Enzo Life Sciences) for 2 hours. Control cells were similarly treated with an equal  
500 volume of vehicle (0.02% ethanol). Cells were washed twice with Dulbecco's PBS (Corning),  
501 and then incubated in fresh, standard growth medium for 16 hrs. Conditioned medium was  
502 then harvested, centrifuged for 10 min at 2,000 RPM, filtered through a 0.22- $\mu$ m filter  
503 (Millipore), and treated to cells or stored at -80°C until use. For TERS priming, conditioned  
504 media was generated from homologous cell type unless otherwise specified. To measure

505 IFN $\gamma$  in TERS CM, QBeads (Intellicyt, Ann Arbor, MI) were used following manufacturer's  
506 instructions. IFN $\gamma$  was quantified on the iQue Screener PLUS (Intellicyt) using a standard  
507 cursive and manufacturer-provided template for analysis.

#### 508 **BMDM and BMDC generation in culture**

509 Bone marrow derived cells were procured by isolating the femur and tibia of specified host  
510 and flushing out the bone marrow using cold, unsupplemented RPMI growth media  
511 (Corning) using a 27 gauge needle and syringe. Hemolysis was performed using ACK Lysis  
512 buffer (Bio Whittaker). For macrophage differentiation, bone marrow cells were incubated  
513 one week in standard growth medium supplemented with 30% L929 conditioned medium  
514 (LCM) or m-CSF (origin) at concentration.

#### 515 **ERAI activity assay**

516 Cancer cell line reporter cells were transduced with the ERAI construct, originally described  
517 (234). Briefly, the pCAX-F-XBP1 $\Delta$ DBD-venus (a kind gift from Dr. Iwawaki, Gunma  
518 University) underwent PCR using following primers: F:  
519 ctaccggactcagatctcgagccaccATGGACTACAAGGACGACG, R:  
520 gaattatctagagtgcggccgcTTACTTGTACAGCTCGTCC. PCR fragments were cloned into  
521 pLVX-puro (Clontech) lentivirus vector with Gibson Assembly Mixture (NEB) according to  
522 manufacturer's instruction. Stbl3 competent cells were transformed to produce the plasmid  
523 insert, whose presence was confirmed by sequencing. For production of lentivirus, 293FT  
524 (Invitrogen) cells were seeded in 10 cm dish and transfected with a plasmid mixture of ERAI  
525 plasmid and psPAX2 and pMD2G viral packaging plasmids. The supernatant of virus-  
526 producing transfected cells was collected every 24 hrs for three days post transfection. Viral  
527 supernatant was concentrated by 10% PEG-8000 and pelleted with 2000 x g for 40 min at 4C  
528 and re-suspended PBS. Target cancer cells were transduced with lentivirus by adding

529 supplementing with polybrene (8  $\mu\text{g}/\text{mL}$ ) to virus containing solution and loaded onto  
530 B16.F10 cancer cell line. Lines were transduced for 48 hours. Following, cells were washed  
531 twice with PBS and positively selected for using puromycin (2  $\mu\text{g}/\text{mL}$ ) for two weeks. In  
532 some instances, positively transduced cells were then stimulated for Venus expression and  
533 were sorted by FACS (BD) to isolate high expressing clones. Lines were maintained under  
534 puromycin.

### 535 **Flow cytometry**

536 Single cell suspensions of myeloid cells were separated and stained for CD80 (B7- 1) (BD  
537 Biosciences), PD-L1 (CD274) (BD Biosciences), and CD86 (BD Biosciences). Viable cells  
538 were determined by 7AAD exclusion and data were acquired using a FACScalibur flow  
539 cytometer (BD). Flow results were analyzed using CellQuest Pro (BD) and Flow JO (Tree  
540 Star) software.

### 541 **RT-qPCR**

542 mRNA was harvested from cells using Nucleospin II Kit (Machery-Nagel) or enzymatically  
543 using the Zygem RNAgem Tissue PLUS kit (Microgembio, New Zealand). Concentration  
544 and purity of RNA was quantified the NanoDrop (ND-1000) spectrophotometer (Thermo  
545 Scientific) and analyzed with NanoDrop Software v3.8.0. RNA was normalized between  
546 conditions and cDNA generated using the High Capacity cDNA Synthesis kit (Life  
547 Technologies). RT-qPCR was performed on ABI 7300 Real-Time PCR system using  
548 TaqMan reagents for 50 cycles using universal cycling conditions. Cycling conditions  
549 followed manufacturer's specifications (KAPA Biosystems). Target gene expression was  
550 normalized to  *$\beta$ -actin* and relative expression determined by using the  $-\Delta\Delta\text{Ct}$  relative  
551 quantification method. Primers for qRT-PCR were purchased from Life Technologies: Arg1,  
552 (Mm00475988\_m1), Cd274 (Mm03048248\_m1), Chop (Mm00492097\_m1), Grp78

553 (Mm00517691\_m1), Il6 (Mm99999064\_m1), Il23-p19 (Mm00518984\_m1), and Tapbp  
554 (Mm00493417\_m1).

### 555 **Western Blot Analysis**

556 After treatment, cells were washed with ice cold PBS and suspended in the RIPA Lysis  
557 Buffer system: 1X RIPA buffer and cocktail of protease inhibitors (Santa Cruz  
558 Biotechnology). Cell lysates were centrifuged at 16,000g for 15 min and the supernatants  
559 were extracted. Protein concentration was determined using Pierce BCA Protein Assay Kit  
560 (Thermo Scientific). Samples were heat denatured and equal concentrations of protein were  
561 electrophoresed on 4-20% Mini-PROTEAN TGX Precast Gels (Bio-Rad) and transferred  
562 onto 0.2  $\mu$ m PVDF membrane in Tris-Glycine transfer buffer containing 20 % methanol. The  
563 membranes were blocked with 5% non-fat milk in TBS containing 0.1 % Tween-20 (TBS-T)  
564 for 1 h at room temperature, and subsequently incubated with diluted primary antibodies  
565 overnight at 4 °C. Membranes were washed for 5 min at room temperature 3 times by TBS-T,  
566 incubated with secondary antibody conjugated with horse radish peroxidase (HRP) in 5 %  
567 non-fat milk for 1 h at room temperature, and washed for 5 min at room temperature 3 times  
568 by TBS-T. Immuno-reactivity was detected by chemi-luminescence reaction using Pierce  
569 ECL Blotting Substrate (Thermo Scientific). Primary antibodies used were: rabbit  
570 monoclonal antibody to IRE1 $\alpha$  (clone 14C10) (Cell Signaling Technology), rabbit polyclonal  
571 antibody to XBP-1s (#83418) (Cell Signaling Technology), goat polyclonal antibody to  
572 GAPDH (A-14) (Santa Cruz Biotechnology). Bound primary antibodies were revealed by the  
573 following secondary antibodies: HRP-conjugated goat antibody to rabbit IgG (Cell Signaling  
574 Technology), and HRP-conjugated donkey antibody to goat IgG (sc2020) (Santa Cruz  
575 Biotechnology).

### 576 **Tumor studies**



577 For orthotropic tumor implantation model, B16.F10 cancer cells (n=4) were detached from  
578 plastic, washed twice with cold PBS, and resuspended at a concentration of 3e5cells/ml in  
579 PSB. Host C57BL/6 or transgenic ERAI mice (a kind gift from Dr. T. Iwawaki (Gunma  
580 University)) were subcutaneously injected with 100  $\mu$ l (3e4 cells) of cell suspension into the  
581 right hind flank. After approximately 22 days, mice bearing tumors greater than 1 cm were  
582 sacrificed. For tumor growth studies, B16.F10 were subcutaneously injected in C57BL/6  
583 (WT) or TLR4 KO mice (a kind gift from Dr. M. Corr (UCSD)). Tumor establishment was  
584 first determined by palpation and size was then measured in two dimensions using calipers.  
585 When tumors reached > 20 mm in any one dimension or after 30 days post implantation,  
586 whichever came first, mice were sacrificed. Tumor volume was calculated using the ellipsoid  
587 volume formula,  $V = 1/2 (H \times W^2)$ . All mice were sacrificed when any tumor reached 20  
588 mm in any one dimension, per UCSD animal welfare standards, or after 30 days post  
589 implantation. Tumor volume was calculated using the ellipsoid formula:  $V = 1/2 (H \times W^2)$ .

#### 590 **Isolation of CD11b<sup>+</sup> and F4/80 cells**

591 For B16.F10 model: B16.F10 cancer cells (n=5) were subcutaneously injected (3e4) into the  
592 right hind flank of C57BL/6 mice. After approximately 22 days, mice bearing tumors greater  
593 than 1 cm were sacrificed. For APC model: APC mice were genotyped for *APC* mutation to  
594 confirmed homozygosity of transgene. At approximately 12-15 weeks of age, APC mice were  
595 sacrificed by cervical dislocation. The small intestine was removed from host and cut  
596 longitudinally, running parallel to the intestinal lining. Adenomas lining the intestine were  
597 excised using an open blade and pooled, respective to the host, in ice cold PBS supplemented  
598 with 0.5% (w/v) bovine serum albumin (BSA). For both model systems: once the tumor,  
599 spleen, and bone marrow were isolated from tumor bearing hosts, tissues were dissociated  
600 through enzymatic digestion (TrypLE) at 37°C for 30 min on a rocker 85 plate, followed by

601 cell straining through a 22  $\mu\text{m}$  filter in ice cold PBS + 0.5% (w/v) BSA. Cell suspensions  
602 were then stained for CD11b<sup>+</sup> positivity by first using a CD11b-biotin conjugated antibody  
603 (BD Biosciences) and incubated for 15 min at 4°C. Cells were then washed twice with PBS +  
604 0.5% BSA and positively selected by magnetic separation using a biotin isolation kit (Stem  
605 Cell) according to manufacturer's specifications. F4/80<sup>+</sup> macrophages were isolated from  
606 subcutaneous B16.ERAI tumors from the right hind flank *Ern1 x LysMCre* or *fl/fl* mice.  
607 After approximately 22 days, mice bearing tumors > 1 cm in length were sacrificed. Tumors  
608 and spleens were isolated, tissues were dissociated through enzymatic digestion (TrypLE) at  
609 37°C for 30 min on a rocker 85 plate, followed by cell straining through a 22  $\mu\text{m}$  filter in ice  
610 cold PBS + 0.5% (w/v) BSA. Cell suspensions were then stained for F4/80<sup>+</sup> positivity by first  
611 using a F4/80-PE conjugated antibody (StemCell Technologies Cat# 60027PE.1) and  
612 incubated for 15 min at 4°C. Cells were then washed twice with PBS 0.5% BSA and  
613 positively-selected by magnetic separation using PE Positive Selection Kit II (StemCell  
614 Technologies) according to manufacturer's specifications.

### 615 **RNASeq analysis**

616 RNA was extracted from wild type or *Ern1* CKO BMDM that were untreated or treated with  
617 TERS CM for 18 hours using the Nucleospin RNA kit (Macherey Nagel). Each group  
618 consisted of 3 independently-derived BMDM. RNA sample purity was ascertained by the  
619 Nanodrop quantification method. Single end stranded RNA libraries for were sequenced on  
620 an Illumina HiSeq 4000. All samples and replicates were sequenced together on the same run.  
621 All 12 mouse RNA-seq transcript quantification was performed with sailfish version 0.9.2  
622 [77], using the GRCm38 mouse transcriptome downloaded from Ensembl (URL:  
623 [ftp://ftp.ensembl.org/pub/release-](ftp://ftp.ensembl.org/pub/release-97/fasta/mus_musculus/cdna/Mus_musculus.GRCm38.cdna.all.fa.gz)  
624 [97/fasta/mus\\_musculus/cdna/Mus\\_musculus.GRCm38.cdna.all.fa.gz](ftp://ftp.ensembl.org/pub/release-97/fasta/mus_musculus/cdna/Mus_musculus.GRCm38.cdna.all.fa.gz)) with default  
625 parameters. The 33 RIDD target genes were collected from [49]. We z-scored these RIDD

626 target genes within each group separately (*Ern1* fl/fl and *Ern1* CKO) and then mean value  
627 was calculated and compared between different phenotype (untreated vs TERS CM treated)  
628 within each group.

### 629 **Ordinary Least Squares (OLS) linear model predicting PD-L1 using IRE1 $\alpha$ pathway** 630 **and PERK pathway downstream genes**

631 OLS models were fitted and compared using the python (version 2.7.15) statsmodels package  
632 (version 0.9.0). We collected IRE1 $\alpha$  pathway (R-HSA-381070.1) and PERK pathway (R-  
633 HSA-381042.1) downstream genes from REACTOME [54]. Each gene was z-scored to  
634 ensure a mean of 0 and standard deviation of 1. Because quantification of transcript levels is  
635 noisier when genes are expressed at low levels, we implemented a filter to remove genes  
636 expressed under a certain threshold and evaluated pathway scores at thresholds ranging from  
637 0 to 1000 reads. We then fitted models at different thresholds to evaluate robustness of the  
638 model to choice of threshold. Models were fitted using the formula:

$$639 \quad PD - L1 = \beta_0 + \sum \beta_i \cdot gene_i$$

640 Nested OLS models with ERN1 only and ERN1 + PERK were compared using the Aikake  
641 information criterion (AIC). For each model, the AIC was calculated as  $AIC = 2k - 2\ln(L)$ ,  
642 where  $k$  represents the number of estimated parameters, and  $L$  represents the likelihood  
643 function for the model. Models were compared using the formula  $\exp((AIC_{\min} - AIC_i)/2)$ ,  
644 which represents the relative likelihood of model  $i$  with respect to the best available model.

### 645 **Statistical analysis**

646 To determine if differences between groups were statistically significant for PCR  
647 experiments, groups were compared using unpaired student's  $t$ -tests with Welch's correction.  
648 Statistically significant differences are indicated as follows: \* $p < 0.05$ , \*\* $p < 0.01$ , \*\*\* $p < 0.001$ ,

649 \*\*\*\* $p < 0.0001$ . Statistical significance in tumor growth experiments was determined using the  
650 Mann-Whitney  $t$  test and survival curves were generated by the Kaplan-Meier method.

### 651 **Acknowledgements**

652 This work was supported in part by grant RO1 CA220009 to M.Z. and H.C. J.J.R.  
653 acknowledges the support of the Frank H. and Eva B. Buck Foundation. The authors thank  
654 Valentina Ferrari for performing the QBeads assay.

### 655 **Author Contributions**

656 Conceptualization, M.Z., J.J.R., H.C., Reagents and Specimens, T.I., J.L., Data Collection,  
657 A.B., J.J.R., S.X., S.S., A.L., G.A., K.J., Manuscript writing, M.Z., S.X, Manuscript  
658 revisions, J.J.R., S.S., J.L., H.C., Supervision, J.J.R., H.C., M.Z. Funding acquisition, M.Z.,  
659 H.C., J.J.R.

### 660 **Declaration of Interests**

661 All the other authors declare no conflict.

662

663

664

665 **Figure legends**

666 **Figure 1. Activation of the UPR and acquisition of the IIS phenotype by tumor-**

667 **infiltrating CD11b<sup>+</sup> cells *in vivo*.** (A) Flow cytometry histogram and comparative mean

668 fluorescent intensity (MFI) values (n=4) of ERAI expression in CD11b<sup>+</sup> cells resident in

669 specified tissue. (B,C) Gene expression in CD11b<sup>+</sup> cells isolated from B16.F10 tumors and

670 respective bone marrow (n≥2 /group). Gene expression was arbitrarily normalized to one

671 bone marrow sample and values represent relative quantification (RQ) fold transcription

672 expression. (D,E) Gene expression in CD11b<sup>+</sup> cells isolated from APC adenomas, and

673 respective bone marrow and spleen (n≥2 / group). RNA extracted from these cells was

674 analyzed by RT-qPCR using specific primers.

675 **Figure 2. Chemical IRE1α inhibition prevents IIS polarization of BMDM *in vitro*.**

676 BMDM were culture *in vitro* in conditioned medium of ER stressed cancer cells (TERS CM)

677 for 18 hours with or without 4u8C (30 μM) and their mRNA subsequently tested by RT-

678 qPCR to detect the expression of (A) UPR genes (Grp78 and Chop) (B) pro-inflammatory

679 cytokines (*Il6* and *Il23p19*), and (C) immune suppression genes (*Arg1*) (n=3-5/group).

680 Relative quantification (RQ) was determined by arbitrarily normalizing gene expression to a

681 Vehicle CM condition. Data points are expressed as means ±SEM. (D) Flow cytometry

682 analysis of the intracellular expression of Venus protein (ERAI), and CD86 and PD-L1

683 surface expression in BMDM treated with conditioned medium of ER stressed tumor cells

684 (TERS CM) with or without 4u8C (30 μM).

685 **Figure 3. Deficiency in the IRE1 $\alpha$ -XBP1 axis in macrophages attenuates the IIS**  
686 **phenotype, PD-L1 expression and tumor growth.** (A) Western blot analysis of *Ern1* CKO  
687 BMDM showing lack Ire1 upon activation (24 hrs) by thapsigargin (Tg) (300 nM). (B)  
688 Western blot analysis of *Ern1* CKO BMDM showing lack of spliced Xbp1 (Xbp1s) following  
689 activation (24 hrs) by by thapsigargin (Tg) (300 nM). (C) Western blot analysis of *Xbp1* CKO  
690 BMDM showing lack of spliced Xbp1 (Xbp1s) following activation (24 hrs) by thapsigargin  
691 (Tg) (300 nM). (D) RT-qPCR analysis of UPR and IIS genes in wild type or CKO BMDM  
692 untreated or treated with TERS CM . Values represent the mean  $\pm$  SEM (n= 3-5/group). (E)  
693 IRE1-XBP1 deficiency reduces CD86 and PD-L1 expression in BMDM. *Ern1* fl/fl, *Xbp1* fl/fl,  
694 *Ern1* CKO and *Xbp1* CKO BMDM were treated (18 hrs) with TERS CM and subsequently  
695 stained with PE-conjugated antibodies to CD86 and CD274. The MFI for both surface proteins  
696 was quantified and plotted against the MFI of the corresponding unstimulated control. Statistical  
697 significance was determined using the Mann-Whitney *t* test. (n=4-5 mice/group).

698 **Figure 4. Tumor growth and tumor-infiltrating macrophage analysis in *Ern1/Xbp1***  
699 **conditional knock out mice.** (A) Kaplan-Meier survival curves of *Ern1* fl/fl, *Xbp1* fl/fl, *Ern1*  
700 CKO and *Xbp1* CKO mice injected in the right flank with 3x10<sup>4</sup> B16.ERAI  
701 cells/mouse. Tumor measurements were taken every two days in two dimensions. Mice  
702 were sacrificed once tumors reached 20 mm in either dimension. (B) Gene expression in  
703 F4/80<sup>+</sup> macrophages isolated from B16.F10 tumors implanted in *Ern1* CKO or fl/fl mice, and  
704 respective spleen controls (n=2/group). mRNA was extracted enzymatically using the Zygem  
705 RNAgem Tissue PLUS kit. Gene expression was arbitrarily normalized to one spleen sample  
706 and values represent relative quantification fold transcript expression. Data points are  
707 expressed as means  $\pm$ SEM.

708 **Figure 5. RIDD analysis of wild type and *Ern1* CKO BMDM treated with TERS CM.**  
709 (A) Fold change in *Cd247* (PD-L1) transcription in *Ern1* deficient (left panel) and *XBP1*  
710 deficient (right panel) bone marrow-derived macrophages activated with TERS CM. (B)  
711 RNASeq analysis of *Ern1* expression in untreated or TERS CM treated wild type or *Ern1*

712 CKO BMDM. TERS CM-induced fold changes are indicated in the graph. (C) Heatmap  
713 showing the relative expression of 16 RIDD target genes in untreated or TERS CM-treated  
714 wild type or *Ern1* CKO BMDM. (D) RNASeq analysis of *Cd274* expression in untreated or  
715 TERS CM treated wild type or *Ern1* CKO BMDM. TERS CM-induced fold changes are  
716 indicated in the graph. (E) Comparison of mean z-scores for the 16 RIDD target genes in  
717 untreated or TERS CM-treated wild type or *Ern1* CKO BMDM.

718 **Figure 6. Ordinary least squares (OLS) linear model prediction of *CD274* gene**  
719 **expression in human tumor associated macrophages.** (A) An illustration of the  
720 development of aggregated pathway scores. For both pathways we used filters with different  
721 thresholds to filter out genes with less read counts to account for baseline technical artifacts.  
722 Then we z-score transformed both the gene matrix for both pathways and aggregated these  
723 scores to predict *CD274* gene expression (B) RNAseq data from tumor associated  
724 macrophages isolated from 13 human endometrial or breast cancer samples were analyzed  
725 using 11 OLS linear models for each pathway (IRE1 $\alpha$  or PERK). Each model was applied  
726 using different filters, each representing increasing read count thresholds. In the upper panel  
727 each dot represents the fraction of genes remaining in the model after a given filter was  
728 applied. In the lower panel the *p* value for each pathway predicting PD-L1 gene expression is  
729 indicated at each read count threshold.

730

731

732

733

734

735

736 **REFERENCES**

- 737 1. Qian BZ, Pollard JW. Macrophage diversity enhances tumor progression and  
738 metastasis. *Cell*. 2010;141(1):39-51. Epub 2010/04/08. doi: S0092-8674(10)00287-4 [pii]  
739 10.1016/j.cell.2010.03.014. PubMed PMID: 20371344.
- 740 2. Tlsty TD, Coussens LM. Tumor stroma and regulation of cancer development. *Annu*  
741 *Rev Pathol*. 2006;1:119-50. Epub 2007/11/28. doi: 10.1146/annurev.pathol.1.110304.100224.  
742 PubMed PMID: 18039110.
- 743 3. Sica A, Bronte V. Altered macrophage differentiation and immune dysfunction in  
744 tumor development. *J Clin Invest*. 2007;117(5):1155-66. Epub 2007/05/04. doi:  
745 10.1172/JCI31422. PubMed PMID: 17476345; PubMed Central PMCID: PMC1857267.
- 746 4. Ostrand-Rosenberg S, Sinha P. Myeloid-derived suppressor cells: linking  
747 inflammation and cancer. *J Immunol*. 2009;182(8):4499-506. Epub 2009/04/04. doi:  
748 182/8/4499 [pii]  
749 10.4049/jimmunol.0802740. PubMed PMID: 19342621; PubMed Central PMCID:  
750 PMC2810498.
- 751 5. Kaneda MM, Messer KS, Ralainirina N, Li H, Leem C, Gorjestani S, et al.  
752 PI3Kgamma is a molecular switch that controls immune suppression. *Nature*. 2016. doi:  
753 10.1038/nature19834. PubMed PMID: 27642729.
- 754 6. Chittechath M, Dhillon MK, Lim JY, Laoui D, Shalova IN, Teo YL, et al. Molecular  
755 profiling reveals a tumor-promoting phenotype of monocytes and macrophages in human  
756 cancer progression. *Immunity*. 2014;41(5):815-29. doi: 10.1016/j.immuni.2014.09.014.  
757 PubMed PMID: 25453823.



- 758 7. Sousa S, Brion R, Lintunen M, Kronqvist P, Sandholm J, Monkkonen J, et al. Human  
759 breast cancer cells educate macrophages toward the M2 activation status. *Breast Cancer Res.*  
760 2015;17:101. Epub 2015/08/06. doi: 10.1186/s13058-015-0621-0. PubMed PMID:  
761 26243145; PubMed Central PMCID: PMC4531540.
- 762 8. Gabrilovich DI, Ostrand-Rosenberg S, Bronte V. Coordinated regulation of myeloid  
763 cells by tumours. *Nat Rev Immunol.* 2012;12(4):253-68. Epub 2012/03/23. doi: nri3175 [pii]  
764 10.1038/nri3175. PubMed PMID: 22437938.
- 765 9. Quail DF, Joyce JA. Microenvironmental regulation of tumor progression and  
766 metastasis. *Nat Med.* 2013;19(11):1423-37. Epub 2013/11/10. doi: 10.1038/nm.3394.  
767 PubMed PMID: 24202395; PubMed Central PMCID: PMC3954707.
- 768 10. Colegio OR, Chu NQ, Szabo AL, Chu T, Rhebergen AM, Jairam V, et al. Functional  
769 polarization of tumour-associated macrophages by tumour-derived lactic acid. *Nature.*  
770 2014;513(7519):559-63. doi: 10.1038/nature13490. PubMed PMID: 25043024.
- 771 11. Hefetz-Sela S, Stein I, Klieger Y, Porat R, Sade-Feldman M, Zreik F, et al.  
772 Acquisition of an immunosuppressive protumorigenic macrophage phenotype depending on  
773 c-Jun phosphorylation. *Proc Natl Acad Sci U S A.* 2014;111(49):17582-7. doi:  
774 10.1073/pnas.1409700111. PubMed PMID: 25422452; PubMed Central PMCID:  
775 PMC4267378.
- 776 12. Condamine T, Dominguez GA, Youn JI, Kossenkov AV, Mony S, Alicea-Torres K, et  
777 al. Lectin-type oxidized LDL receptor-1 distinguishes population of human  
778 polymorphonuclear myeloid-derived suppressor cells in cancer patients. *Sci Immunol.*  
779 2016;1(2). Epub 2017/04/19. doi: 10.1126/sciimmunol.aaf8943. PubMed PMID: 28417112;  
780 PubMed Central PMCID: PMC45391495.

- 781 13. Baer C, Squadrito ML, Laoui D, Thompson D, Hansen SK, Kiialainen A, et al.  
782 Suppression of microRNA activity amplifies IFN-gamma-induced macrophage activation and  
783 promotes anti-tumour immunity. *Nat Cell Biol.* 2016;18(7):790-802. Epub 2016/06/14. doi:  
784 10.1038/ncb3371. PubMed PMID: 27295554.
- 785 14. Tavazoie MF, Pollack I, Tanqueco R, Ostendorf BN, Reis BS, Gonsalves FC, et al.  
786 LXR/ApoE Activation Restricts Innate Immune Suppression in Cancer. *Cell.*  
787 2018;172(4):825-40 e18. Epub 2018/01/18. doi: 10.1016/j.cell.2017.12.026. PubMed PMID:  
788 29336888; PubMed Central PMCID: PMC5846344.
- 789 15. Koumenis C. ER stress, hypoxia tolerance and tumor progression. *Curr Mol Med.*  
790 2006;6(1):55-69. Epub 2006/02/14. PubMed PMID: 16472113.
- 791 16. Stewart B, Wild C. *World Cancer Report 2014.* Geneva: World Health Organization,  
792 2014.
- 793 17. Weaver BA, Cleveland DW. The aneuploidy paradox in cell growth and  
794 tumorigenesis. *Cancer Cell.* 2008;14(6):431-3. Epub 2008/12/09. doi:  
795 10.1016/j.ccr.2008.11.011. PubMed PMID: 19061834; PubMed Central PMCID:  
796 PMC3132552.
- 797 18. Clarke HJ, Chambers JE, Liniker E, Marciniak SJ. Endoplasmic reticulum stress in  
798 malignancy. *Cancer Cell.* 2014;25(5):563-73. doi: 10.1016/j.ccr.2014.03.015. PubMed  
799 PMID: 24823636.
- 800 19. Wang M, Kaufman RJ. The impact of the endoplasmic reticulum protein-folding  
801 environment on cancer development. *Nat Rev Cancer.* 2014;14(9):581-97. doi:  
802 10.1038/nrc3800. PubMed PMID: 25145482.
- 803 20. Walter P, Ron D. The unfolded protein response: from stress pathway to homeostatic  
804 regulation. *Science.* 2011;334(6059):1081-6. Epub 2011/11/26. doi: 334/6059/1081 [pii]

- 805 10.1126/science.1209038. PubMed PMID: 22116877.
- 806 21. Mori K. Signalling pathways in the unfolded protein response: development from  
807 yeast to mammals. *J Biochem.* 2009;146(6):743-50. doi: 10.1093/jb/mvp166. PubMed  
808 PMID: 19861400.
- 809 22. Schroder M, Kaufman RJ. ER stress and the unfolded protein response. *Mutat Res.*  
810 2005;569(1-2):29-63. PubMed PMID: 15603751.
- 811 23. Martinon F, Chen X, Lee AH, Glimcher LH. TLR activation of the transcription  
812 factor XBP1 regulates innate immune responses in macrophages. *Nat Immunol.*  
813 2010;11(5):411-8. Epub 2010/03/31. doi: ni.1857 [pii]  
814 10.1038/ni.1857. PubMed PMID: 20351694.
- 815 24. Hollien J, Weissman JS. Decay of endoplasmic reticulum-localized mRNAs during  
816 the unfolded protein response. *Science.* 2006;313(5783):104-7. doi:  
817 10.1126/science.1129631. PubMed PMID: 16825573.
- 818 25. Yoshida H, Matsui T, Yamamoto A, Okada T, Mori K. XBP1 mRNA is induced by  
819 ATF6 and spliced by IRE1 in response to ER stress to produce a highly active transcription  
820 factor. *Cell.* 2001;107(7):881-91. Epub 2002/01/10. doi: S0092-8674(01)00611-0 [pii].  
821 PubMed PMID: 11779464.
- 822 26. Mahadevan NR, Rodvold J, Sepulveda H, Rossi S, Drew AF, Zanetti M.  
823 Transmission of endoplasmic reticulum stress and pro-inflammation from tumor cells to  
824 myeloid cells. *Proc Natl Acad Sci U S A.* 2011;108(16):6561-6. Epub 2011/04/06. doi:  
825 1008942108 [pii]  
826 10.1073/pnas.1008942108. PubMed PMID: 21464300; PubMed Central PMCID:  
827 PMC3081038.

- 828 27. Rodvold JJ, Chiu KT, Hiramatsu N, Nussbacher JK, Galimberti V, Mahadevan NR, et  
829 al. Intercellular transmission of the unfolded protein response promotes survival and drug  
830 resistance in cancer cells. *Sci Signal*. 2017;10(482). Epub 2017/06/08. doi:  
831 10.1126/scisignal.aah7177. PubMed PMID: 28588081.
- 832 28. Mahadevan NR, Anufreichik V, Rodvold JJ, Chiu KT, Sepulveda H, Zanetti M. Cell-  
833 Extrinsic Effects of Tumor ER Stress Imprint Myeloid Dendritic Cells and Impair CD8(+) T  
834 Cell Priming. *PLoS One*. 2012;7(12):e51845. Epub 2012/12/29. doi:  
835 10.1371/journal.pone.0051845  
836 PONE-D-12-20796 [pii]. PubMed PMID: 23272178; PubMed Central PMCID:  
837 PMC3525659.
- 838 29. Axelrod R, Axelrod DE, Pienta KJ. Evolution of cooperation among tumor cells. *Proc*  
839 *Natl Acad Sci U S A*. 2006;103(36):13474-9. doi: 10.1073/pnas.0606053103. PubMed  
840 PMID: 16938860; PubMed Central PMCID: PMC1557388.
- 841 30. Gurdon JB, Lemaire P, Kato K. Community effects and related phenomena in  
842 development. *Cell*. 1993;75(5):831-4. PubMed PMID: 8252618.
- 843 31. Jouanneau J, Moens G, Bourgeois Y, Poupon MF, Thiery JP. A minority of  
844 carcinoma cells producing acidic fibroblast growth factor induces a community effect for  
845 tumor progression. *Proc Natl Acad Sci U S A*. 1994;91(1):286-90. PubMed PMID: 7506417;  
846 PubMed Central PMCID: PMC42932.
- 847 32. Kim S, Takahashi H, Lin WW, Descargues P, Grivennikov S, Kim Y, et al.  
848 Carcinoma-produced factors activate myeloid cells through TLR2 to stimulate metastasis.  
849 *Nature*. 2009;457(7225):102-6. Epub 2009/01/06. doi: nature07623 [pii]  
850 10.1038/nature07623. PubMed PMID: 19122641.

- 851 33. Grivennikov S, Karin E, Terzic J, Mucida D, Yu GY, Vallabhapurapu S, et al. IL-6  
852 and Stat3 are required for survival of intestinal epithelial cells and development of colitis-  
853 associated cancer. *Cancer Cell*. 2009;15(2):103-13. doi: 10.1016/j.ccr.2009.01.001. PubMed  
854 PMID: 19185845; PubMed Central PMCID: PMC2667107.
- 855 34. Langowski JL, Zhang X, Wu L, Mattson JD, Chen T, Smith K, et al. IL-23 promotes  
856 tumour incidence and growth. *Nature*. 2006;442(7101):461-5. PubMed PMID: 16688182.
- 857 35. Norian LA, Rodriguez PC, O'Mara LA, Zabaleta J, Ochoa AC, Cella M, et al. Tumor-  
858 infiltrating regulatory dendritic cells inhibit CD8+ T cell function via L-arginine metabolism.  
859 *Cancer Res*. 2009;69(7):3086-94. Epub 2009/03/19. doi: 0008-5472.CAN-08-2826 [pii]  
860 10.1158/0008-5472.CAN-08-2826. PubMed PMID: 19293186; PubMed Central PMCID:  
861 PMC2848068.
- 862 36. Cubillos-Ruiz JR, Silberman PC, Rutkowski MR, Chopra S, Perales-Puchalt A, Song  
863 M, et al. ER Stress Sensor XBP1 Controls Anti-tumor Immunity by Disrupting Dendritic Cell  
864 Homeostasis. *Cell*. 2015;161(7):1527-38. doi: 10.1016/j.cell.2015.05.025. PubMed PMID:  
865 26073941.
- 866 37. Cook KL, Soto-Pantoja DR, Clarke PA, Cruz MI, Zwart A, Warri A, et al.  
867 Endoplasmic Reticulum Stress Protein GRP78 Modulates Lipid Metabolism to Control Drug  
868 Sensitivity and Antitumor Immunity in Breast Cancer. *Cancer Res*. 2016;76(19):5657-70.  
869 Epub 2016/10/05. doi: 10.1158/0008-5472.CAN-15-2616. PubMed PMID: 27698188;  
870 PubMed Central PMCID: PMC5117832.
- 871 38. Gentles AJ, Newman AM, Liu CL, Bratman SV, Feng W, Kim D, et al. The  
872 prognostic landscape of genes and infiltrating immune cells across human cancers. *Nat Med*.  
873 2015;21(8):938-45. doi: 10.1038/nm.3909. PubMed PMID: 26193342.

- 874 39. Condamine T, Kumar V, Ramachandran IR, Youn JI, Celis E, Finnberg N, et al. ER  
875 stress regulates myeloid-derived suppressor cell fate through TRAIL-R-mediated apoptosis. *J*  
876 *Clin Invest*. 2014;124(6):2626-39. doi: 10.1172/JCI74056. PubMed PMID: 24789911;  
877 PubMed Central PMCID: PMC4038578.
- 878 40. Osorio F, Tavernier SJ, Hoffmann E, Saeys Y, Martens L, Vettters J, et al. The  
879 unfolded-protein-response sensor IRE-1 $\alpha$  regulates the function of CD8 $\alpha$ (+) dendritic  
880 cells. *Nat Immunol*. 2014;15(3):248-57. doi: 10.1038/ni.2808. PubMed PMID: 24441789.
- 881 41. Iwawaki T, Akai R, Kohno K, Miura M. A transgenic mouse model for monitoring  
882 endoplasmic reticulum stress. *Nat Med*. 2004;10(1):98-102. PubMed PMID: 14702639.
- 883 42. Moser AR, Luongo C, Gould KA, McNeley MK, Shoemaker AR, Dove WF.  
884 *ApcMin*: a mouse model for intestinal and mammary tumorigenesis. *Eur J Cancer*.  
885 1995;31A(7-8):1061-4. Epub 1995/07/01. PubMed PMID: 7576992.
- 886 43. Axten JM, Romeril SP, Shu A, Ralph J, Medina JR, Feng Y, et al. Discovery of  
887 GSK2656157: An Optimized PERK Inhibitor Selected for Preclinical Development. *ACS*  
888 *Med Chem Lett*. 2013;4(10):964-8. doi: 10.1021/ml400228e. PubMed PMID: 24900593;  
889 PubMed Central PMCID: PMC4027568.
- 890 44. Iwakoshi NN, Pypaert M, Glimcher LH. The transcription factor XBP-1 is essential  
891 for the development and survival of dendritic cells. *J Exp Med*. 2007;204(10):2267-75. Epub  
892 2007/09/19. doi: jem.20070525 [pii]  
893 10.1084/jem.20070525. PubMed PMID: 17875675; PubMed Central PMCID: PMC2118458.
- 894 45. Tavernier SJ, Osorio F, Vandersarren L, Vettters J, Vanlangenakker N, Van Isterdael  
895 G, et al. Regulated IRE1-dependent mRNA decay sets the threshold for dendritic cell  
896 survival. *Nat Cell Biol*. 2017;19(6):698-710. Epub 2017/05/02. doi: 10.1038/ncb3518.  
897 PubMed PMID: 28459443; PubMed Central PMCID: PMC4563826.

- 898 46. Cross BC, Bond PJ, Sadowski PG, Jha BK, Zak J, Goodman JM, et al. The molecular  
899 basis for selective inhibition of unconventional mRNA splicing by an IRE1-binding small  
900 molecule. *Proc Natl Acad Sci U S A*. 2012;109(15):E869-78. doi: 10.1073/pnas.1115623109.  
901 PubMed PMID: 22315414; PubMed Central PMCID: PMC3326519.
- 902 47. Hetz C, Lee AH, Gonzalez-Romero D, Thielen P, Castilla J, Soto C, et al. Unfolded  
903 protein response transcription factor XBP-1 does not influence prion replication or  
904 pathogenesis. *Proc Natl Acad Sci U S A*. 2008;105(2):757-62. Epub 2008/01/08. doi:  
905 0711094105 [pii]  
906 10.1073/pnas.0711094105. PubMed PMID: 18178615; PubMed Central PMCID:  
907 PMC2206609.
- 908 48. Clausen BE, Burkhardt C, Reith W, Renkawitz R, Forster I. Conditional gene  
909 targeting in macrophages and granulocytes using LysMcre mice. *Transgenic Res*.  
910 1999;8(4):265-77. Epub 2000/01/06. PubMed PMID: 10621974.
- 911 49. Maurel M, Chevet E, Tavernier J, Gerlo S. Getting RIDD of RNA: IRE1 in cell fate  
912 regulation. *Trends Biochem Sci*. 2014. doi: 10.1016/j.tibs.2014.02.008. PubMed PMID:  
913 24657016.
- 914 50. Howarth M, Williams A, Tolstrup AB, Elliott T. Tapasin enhances MHC class I  
915 peptide presentation according to peptide half-life. *Proc Natl Acad Sci U S A*.  
916 2004;101(32):11737-42. PubMed PMID: 15286279.
- 917 51. Xu Y, Poggio M, Jin HY, Shi Z, Forester CM, Wang Y, et al. Translation control of  
918 the immune checkpoint in cancer and its therapeutic targeting. *Nat Med*. 2019;25(2):301-11.  
919 Epub 2019/01/16. doi: 10.1038/s41591-018-0321-2. PubMed PMID: 30643286; PubMed  
920 Central PMCID: PMC6613562.

- 921 52. Cassetta L, Fragkogianni S, Sims AH, Swierczak A, Forrester LM, Zhang H, et al.  
922 Human Tumor-Associated Macrophage and Monocyte Transcriptional Landscapes Reveal  
923 Cancer-Specific Reprogramming, Biomarkers, and Therapeutic Targets. *Cancer Cell*.  
924 2019;35(4):588-602 e10. Epub 2019/04/02. doi: 10.1016/j.ccell.2019.02.009. PubMed PMID:  
925 30930117; PubMed Central PMCID: PMC6472943.
- 926 53. Adams CJ, Kopp MC, Larburu N, Nowak PR, Ali MMU. Structure and Molecular  
927 Mechanism of ER Stress Signaling by the Unfolded Protein Response Signal Activator IRE1.  
928 *Front Mol Biosci*. 2019;6:11. Epub 2019/04/02. doi: 10.3389/fmolb.2019.00011. PubMed  
929 PMID: 30931312; PubMed Central PMCID: PMC6423427.
- 930 54. Fabregat A, Jupe S, Matthews L, Sidiropoulos K, Gillespie M, Garapati P, et al. The  
931 Reactome Pathway Knowledgebase. *Nucleic Acids Res*. 2018;46(D1):D649-D55. Epub  
932 2017/11/18. doi: 10.1093/nar/gkx1132. PubMed PMID: 29145629; PubMed Central PMCID:  
933 PMC6453187.
- 934 55. Cassetta L, Pollard JW. Targeting macrophages: therapeutic approaches in cancer.  
935 *Nat Rev Drug Discov*. 2018;17(12):887-904. Epub 2018/10/27. doi: 10.1038/nrd.2018.169.  
936 PubMed PMID: 30361552.
- 937 56. Van Ginderachter JA, Movahedi K, Hassanzadeh Ghassabeh G, Meerschaut S,  
938 Beschin A, Raes G, et al. Classical and alternative activation of mononuclear phagocytes:  
939 picking the best of both worlds for tumor promotion. *Immunobiology*. 2006;211(6-8):487-  
940 501. Epub 2006/08/22. doi: S0171-2985(06)00082-9 [pii]  
941 10.1016/j.imbio.2006.06.002. PubMed PMID: 16920488.
- 942 57. Mahadevan NR, Zanetti M. Tumor stress inside out: Cell-extrinsic effects of the  
943 unfolded protein response in tumor cells modulate the immunological landscape of the tumor  
944 microenvironment. *J Immunol*. 2011;187(9):4403-9. Epub 2011/10/21. doi: 187/9/4403 [pii]



- 945 10.4049/jimmunol.1101531. PubMed PMID: 22013206.
- 946 58. Junjappa RP, Patil P, Bhattarai KR, Kim HR, Chae HJ. IRE1alpha Implications in  
947 Endoplasmic Reticulum Stress-Mediated Development and Pathogenesis of Autoimmune  
948 Diseases. *Front Immunol.* 2018;9:1289. Epub 2018/06/22. doi: 10.3389/fimmu.2018.01289.  
949 PubMed PMID: 29928282; PubMed Central PMCID: PMC5997832.
- 950 59. Shan B, Wang X, Wu Y, Xu C, Xia Z, Dai J, et al. The metabolic ER stress sensor  
951 IRE1alpha suppresses alternative activation of macrophages and impairs energy expenditure  
952 in obesity. *Nat Immunol.* 2017;18(5):519-29. Epub 2017/03/28. doi: 10.1038/ni.3709.  
953 PubMed PMID: 28346409.
- 954 60. Robblee MM, Kim CC, Porter Abate J, Valdearcos M, Sandlund KL, Shenoy MK, et  
955 al. Saturated Fatty Acids Engage an IRE1alpha-Dependent Pathway to Activate the NLRP3  
956 Inflammasome in Myeloid Cells. *Cell Rep.* 2016;14(11):2611-23. Epub 2016/03/15. doi:  
957 10.1016/j.celrep.2016.02.053. PubMed PMID: 26971994; PubMed Central PMCID:  
958 PMC5242525.
- 959 61. Nish SA, Schenten D, Wunderlich FT, Pope SD, Gao Y, Hoshi N, et al. T cell-  
960 intrinsic role of IL-6 signaling in primary and memory responses. *Elife.* 2014;3:e01949. Epub  
961 2014/05/21. doi: 10.7554/eLife.01949. PubMed PMID: 24842874; PubMed Central PMCID:  
962 PMC4046568.
- 963 62. Yang R, Masters AR, Fortner KA, Champagne DP, Yanguas-Casas N, Silberberger DJ,  
964 et al. IL-6 promotes the differentiation of a subset of naive CD8+ T cells into IL-21-  
965 producing B helper CD8+ T cells. *J Exp Med.* 2016;213(11):2281-91. Epub 2016/11/05. doi:  
966 10.1084/jem.20160417. PubMed PMID: 27670591; PubMed Central PMCID:  
967 PMC5068236.

- 968 63. Li B, Jones LL, Geiger TL. IL-6 Promotes T Cell Proliferation and Expansion under  
969 Inflammatory Conditions in Association with Low-Level ROR $\gamma$  Expression. *J*  
970 *Immunol.* 2018;201(10):2934-46. Epub 2018/10/14. doi: 10.4049/jimmunol.1800016.  
971 PubMed PMID: 30315140; PubMed Central PMCID: PMC6324200.
- 972 64. Aggarwal S, Ghilardi N, Xie MH, de Sauvage FJ, Gurney AL. Interleukin-23  
973 promotes a distinct CD4 T cell activation state characterized by the production of interleukin-  
974 17. *J Biol Chem.* 2003;278(3):1910-4. Epub 2002/11/06. doi: 10.1074/jbc.M207577200.  
975 PubMed PMID: 12417590.
- 976 65. Revu S, Wu J, Henkel M, Rittenhouse N, Menk A, Delgoffe GM, et al. IL-23 and IL-  
977 1 $\beta$  Drive Human Th17 Cell Differentiation and Metabolic Reprogramming in Absence of  
978 CD28 Costimulation. *Cell Rep.* 2018;22(10):2642-53. Epub 2018/03/08. doi:  
979 10.1016/j.celrep.2018.02.044. PubMed PMID: 29514093; PubMed Central PMCID:  
980 PMC5884137.
- 981 66. Sun C, Mezzadra R, Schumacher TN. Regulation and Function of the PD-L1  
982 Checkpoint. *Immunity.* 2018;48(3):434-52. Epub 2018/03/22. doi:  
983 10.1016/j.immuni.2018.03.014. PubMed PMID: 29562194.
- 984 67. Lin H, Wei S, Hurt EM, Green MD, Zhao L, Vatan L, et al. Host expression of PD-L1  
985 determines efficacy of PD-L1 pathway blockade-mediated tumor regression. *J Clin Invest.*  
986 2018;128(2):805-15. Epub 2018/01/18. doi: 10.1172/JCI96113. PubMed PMID: 29337305;  
987 PubMed Central PMCID: PMC5785251.
- 988 68. Tang H, Liang Y, Anders RA, Taube JM, Qiu X, Mulgaonkar A, et al. PD-L1 on host  
989 cells is essential for PD-L1 blockade-mediated tumor regression. *J Clin Invest.*  
990 2018;128(2):580-8. Epub 2018/01/18. doi: 10.1172/JCI96061. PubMed PMID: 29337303;  
991 PubMed Central PMCID: PMC5785245.

- 992 69. Ahmadzadeh M, Johnson LA, Heemskerk B, Wunderlich JR, Dudley ME, White DE,  
993 et al. Tumor antigen-specific CD8 T cells infiltrating the tumor express high levels of PD-1  
994 and are functionally impaired. *Blood*. 2009;114(8):1537-44. doi: 10.1182/blood-2008-12-  
995 195792. PubMed PMID: 19423728; PubMed Central PMCID: PMC2927090.
- 996 70. Kamada T, Togashi Y, Tay C, Ha D, Sasaki A, Nakamura Y, et al. PD-1(+)  
997 regulatory T cells amplified by PD-1 blockade promote hyperprogression of cancer. *Proc*  
998 *Natl Acad Sci U S A*. 2019;116(20):9999-10008. Epub 2019/04/28. doi:  
999 10.1073/pnas.1822001116. PubMed PMID: 31028147; PubMed Central PMCID:  
1000 PMC6525547.
- 1001 71. Upton JP, Wang L, Han D, Wang ES, Huskey NE, Lim L, et al. IRE1alpha cleaves  
1002 select microRNAs during ER stress to derepress translation of proapoptotic Caspase-2.  
1003 *Science*. 2012;338(6108):818-22. doi: 10.1126/science.1226191. PubMed PMID: 23042294;  
1004 PubMed Central PMCID: PMC3742121.
- 1005 72. Wang JM, Qiu Y, Yang Z, Kim H, Qian Q, Sun Q, et al. IRE1alpha prevents hepatic  
1006 steatosis by processing and promoting the degradation of select microRNAs. *Sci Signal*.  
1007 2018;11(530). Epub 2018/05/17. doi: 10.1126/scisignal.aao4617. PubMed PMID: 29764990;  
1008 PubMed Central PMCID: PMC6075656.
- 1009 73. Wang X, Li J, Dong K, Lin F, Long M, Ouyang Y, et al. Tumor suppressor miR-34a  
1010 targets PD-L1 and functions as a potential immunotherapeutic target in acute myeloid  
1011 leukemia. *Cell Signal*. 2015;27(3):443-52. Epub 2014/12/17. doi:  
1012 10.1016/j.cellsig.2014.12.003. PubMed PMID: 25499621.
- 1013 74. Cortez MA, Ivan C, Valdecanas D, Wang X, Peltier HJ, Ye Y, et al. PDL1 Regulation  
1014 by p53 via miR-34. *J Natl Cancer Inst*. 2016;108(1). Epub 2015/11/19. doi:

- 1015 10.1093/jnci/djv303. PubMed PMID: 26577528; PubMed Central PMCID:  
1016 PMCPMC4862407.
- 1017 75. Sun J, Liu Y, Aballay A. Organismal regulation of XBP-1-mediated unfolded protein  
1018 response during development and immune activation. *EMBO Rep.* 2012;13(9):855-60. doi:  
1019 10.1038/embor.2012.100. PubMed PMID: 22791024; PubMed Central PMCID:  
1020 PMC3432796.
- 1021 76. Taylor RC, Dillin A. XBP-1 Is a Cell-Nonautonomous Regulator of Stress Resistance  
1022 and Longevity. *Cell.* 2013;153(7):1435-47. doi: 10.1016/j.cell.2013.05.042. PubMed PMID:  
1023 23791175.
- 1024 77. Patro R, Mount SM, Kingsford C. Sailfish enables alignment-free isoform  
1025 quantification from RNA-seq reads using lightweight algorithms. *Nat Biotechnol.*  
1026 2014;32(5):462-4. doi: 10.1038/nbt.2862. PubMed PMID: 24752080; PubMed Central  
1027 PMCID: PMC4077321.
- 1028

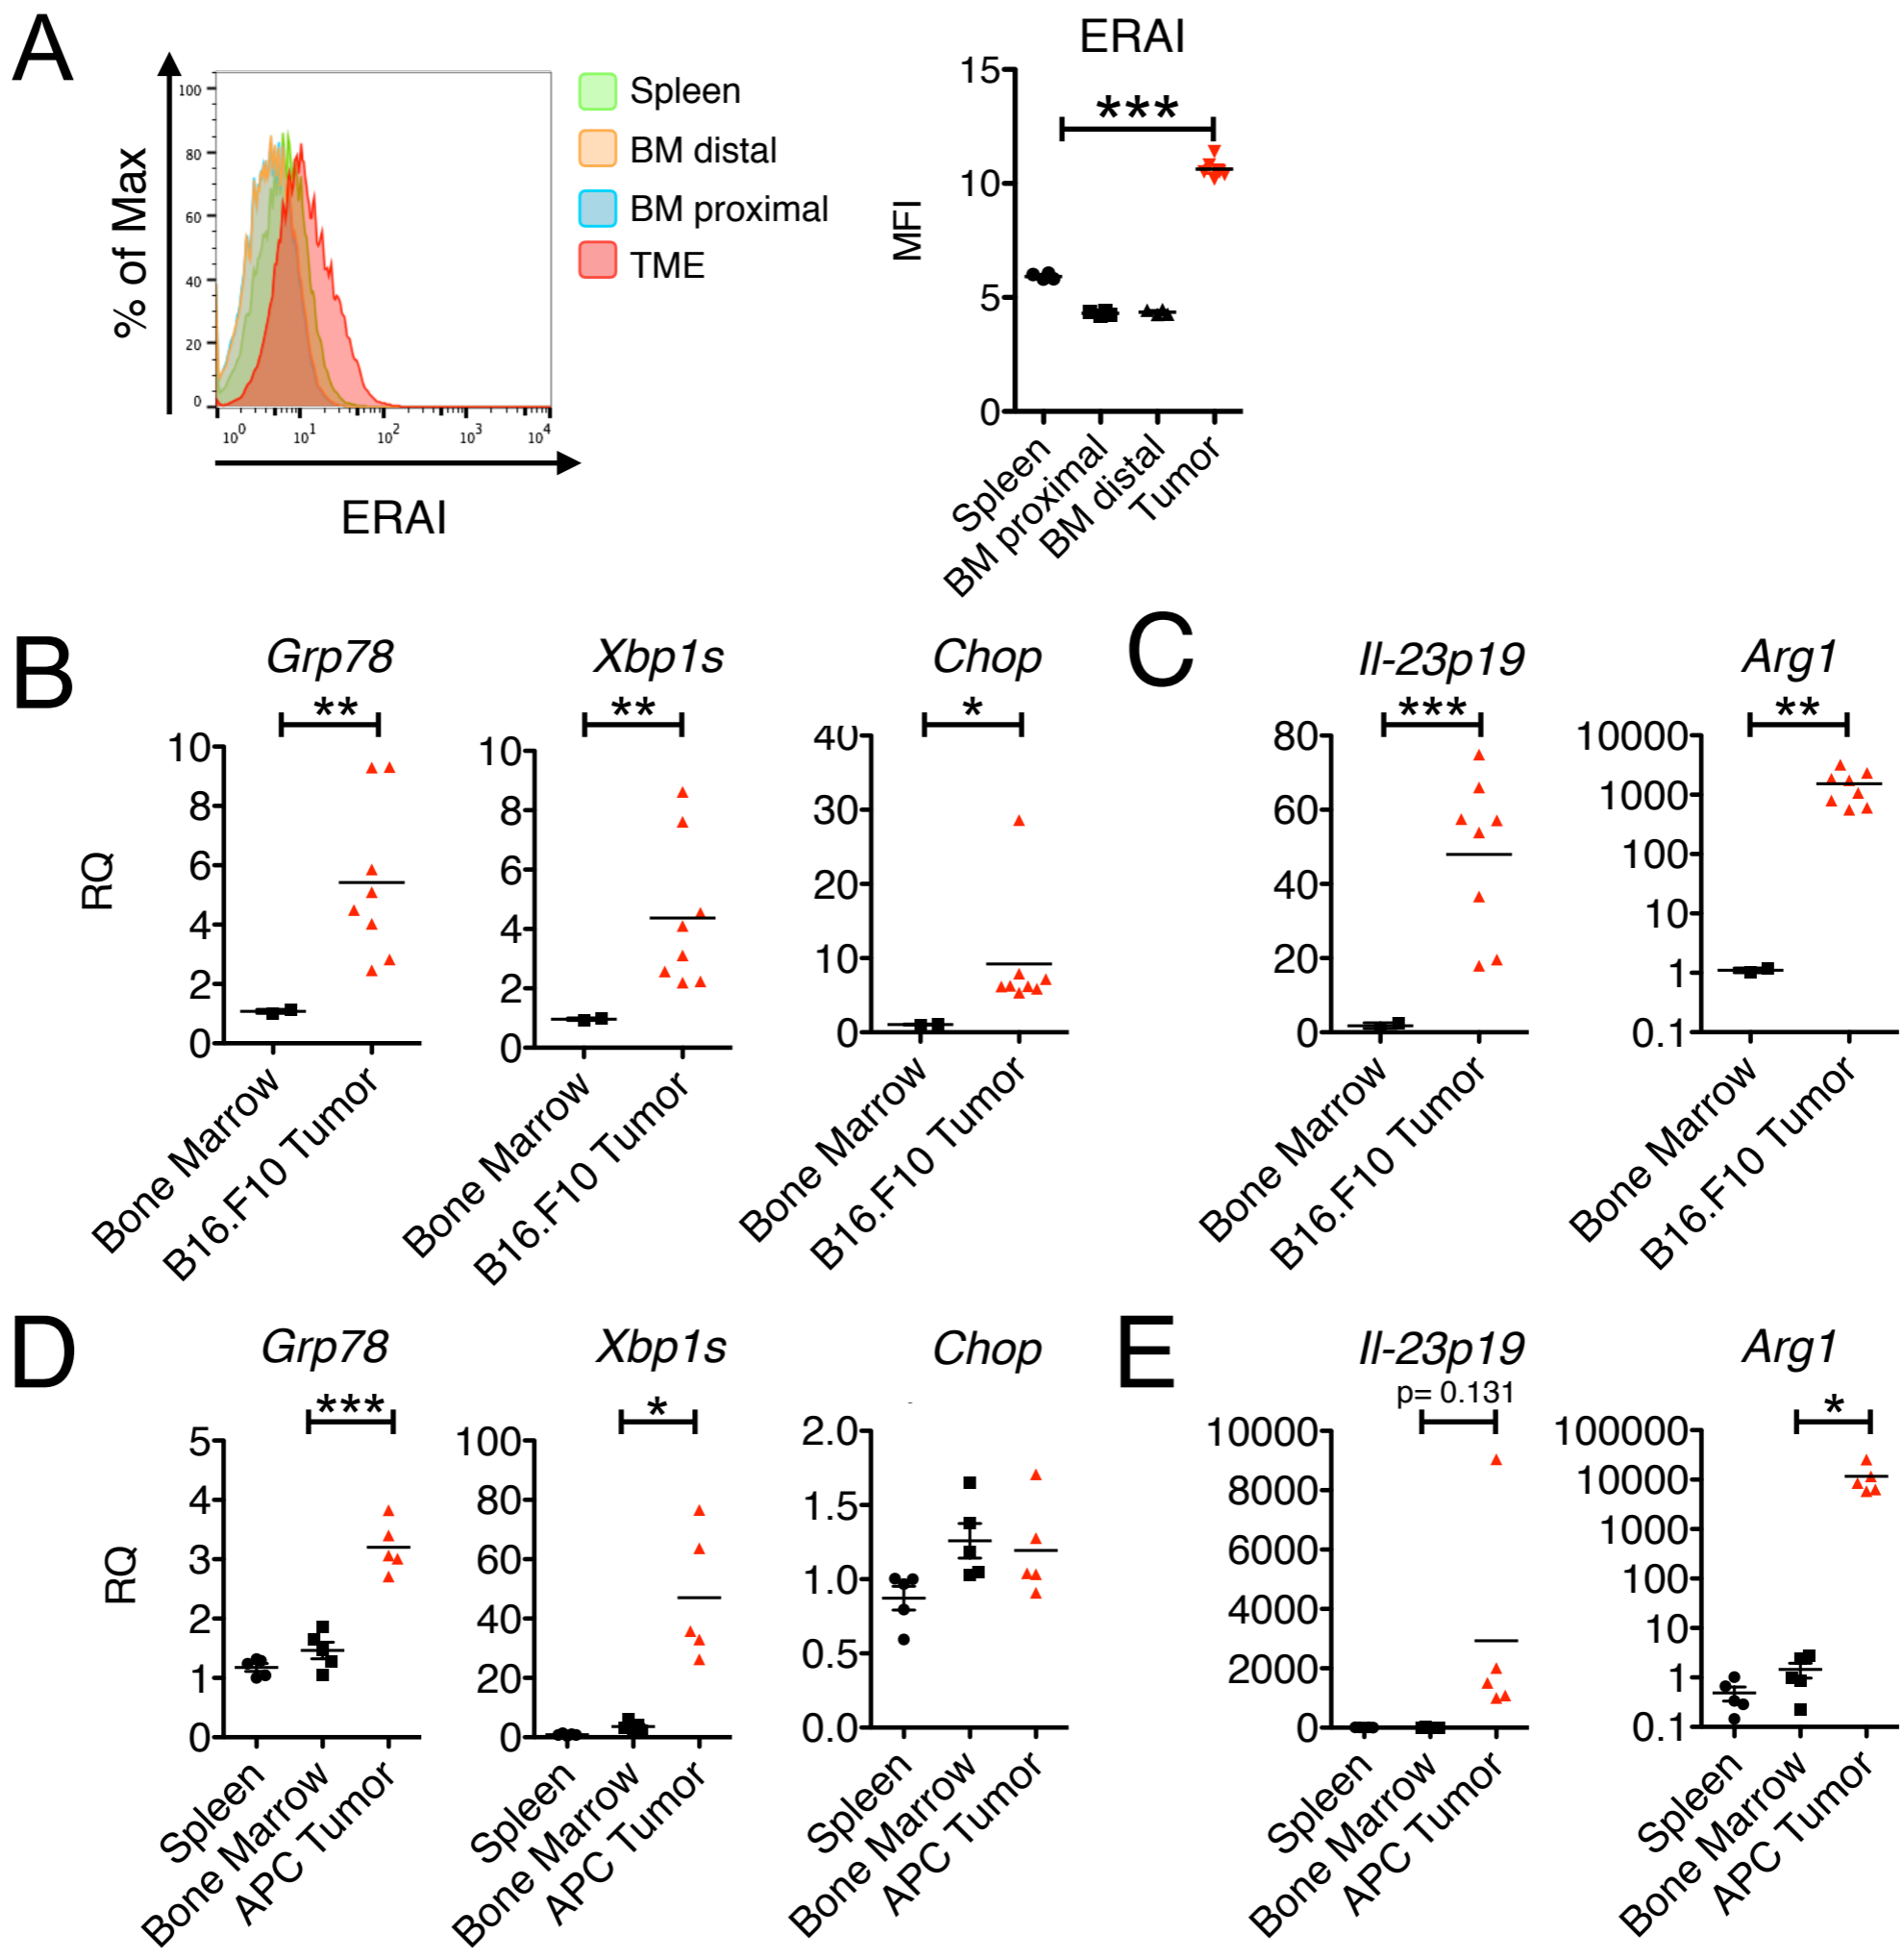

Fig 1.

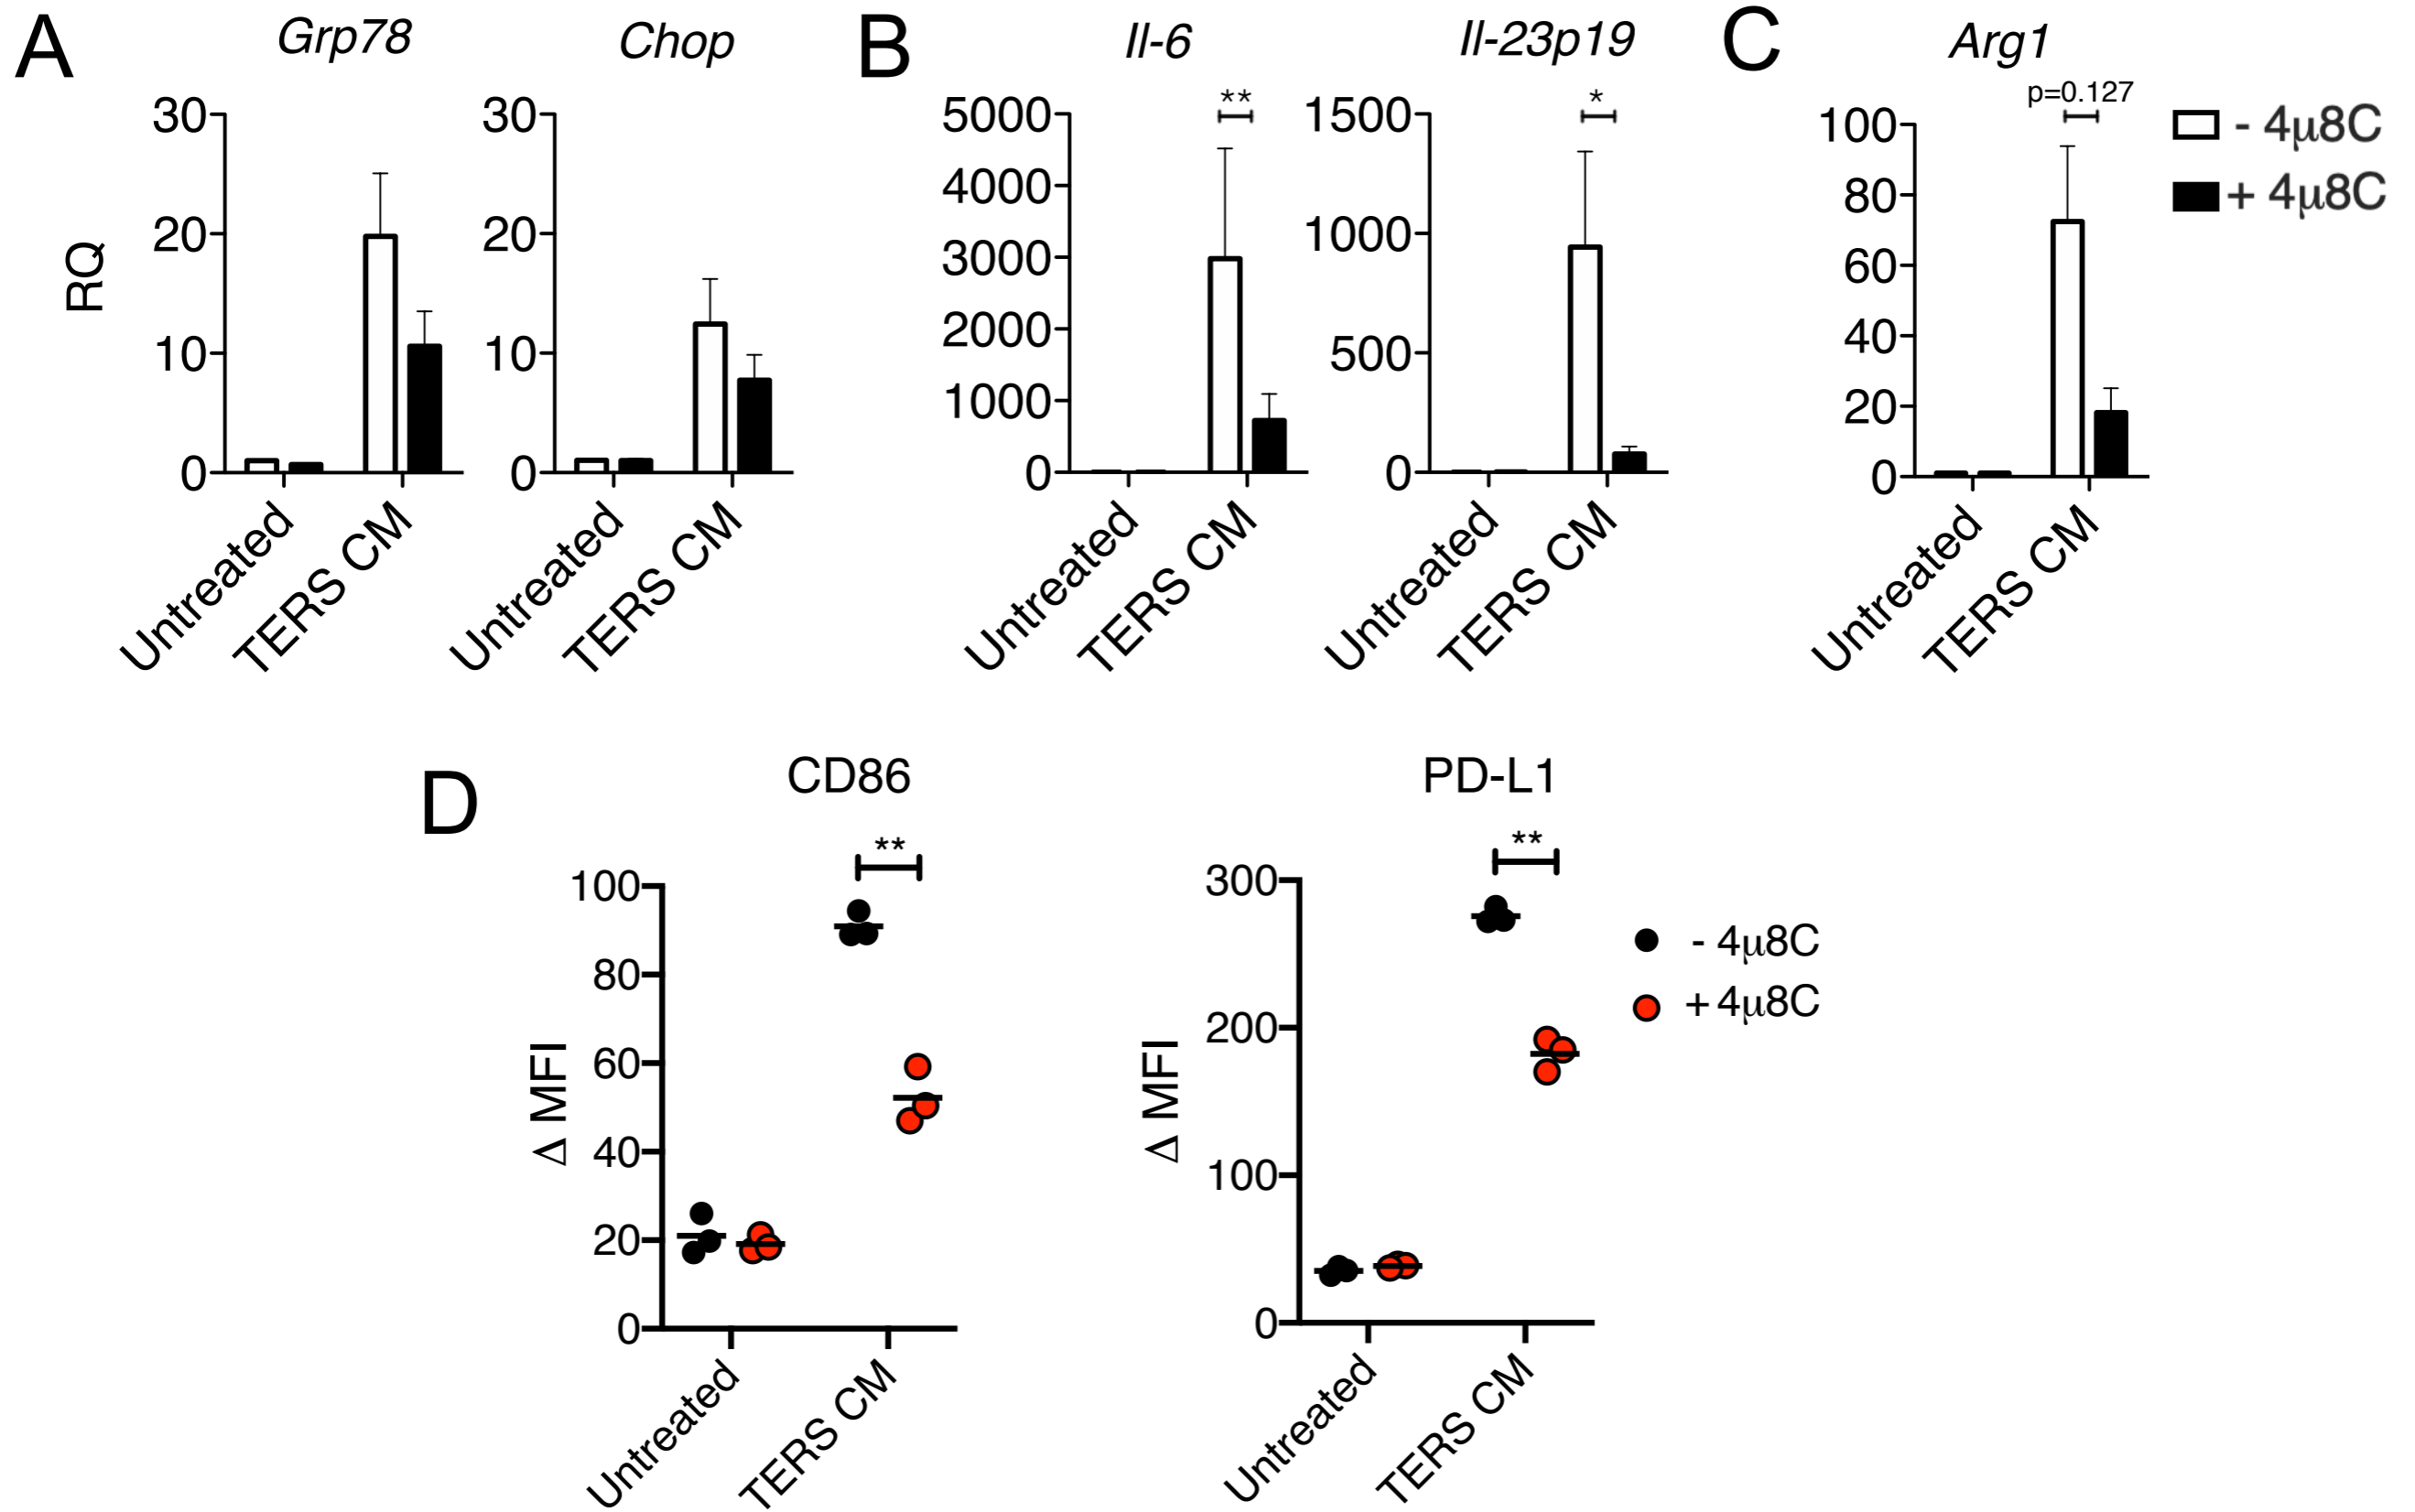

Fig 2.

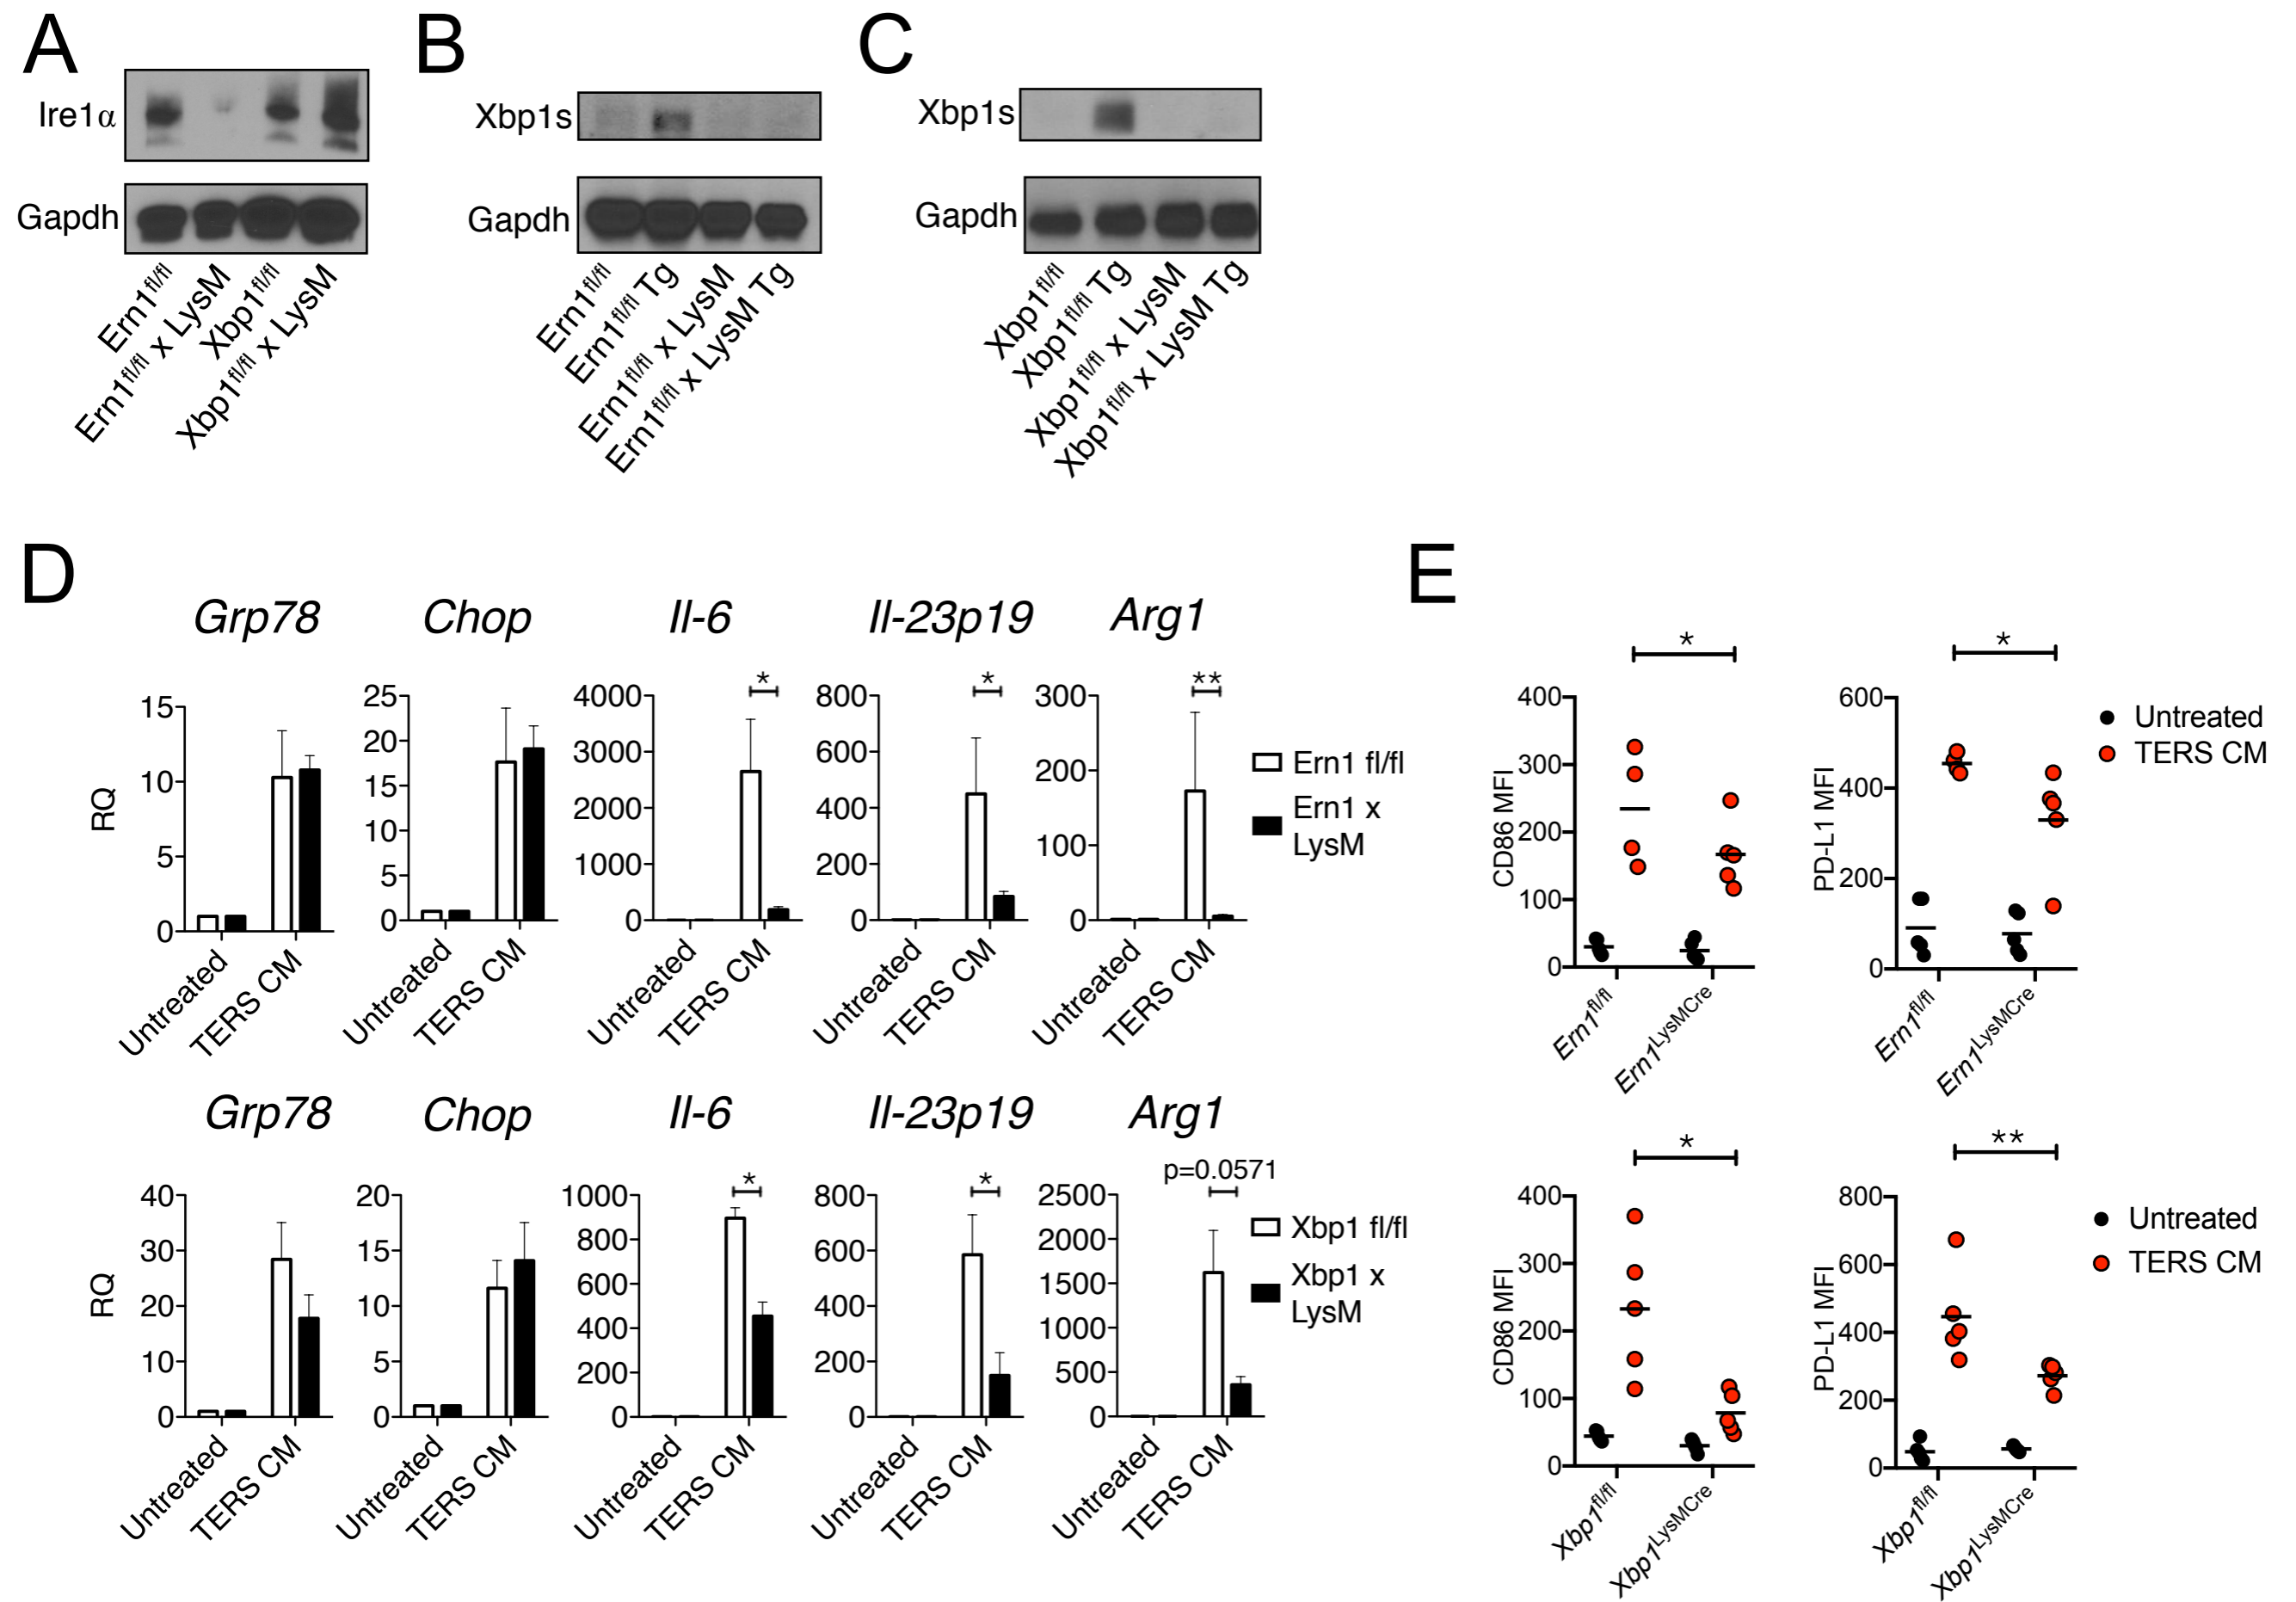

Fig 3.

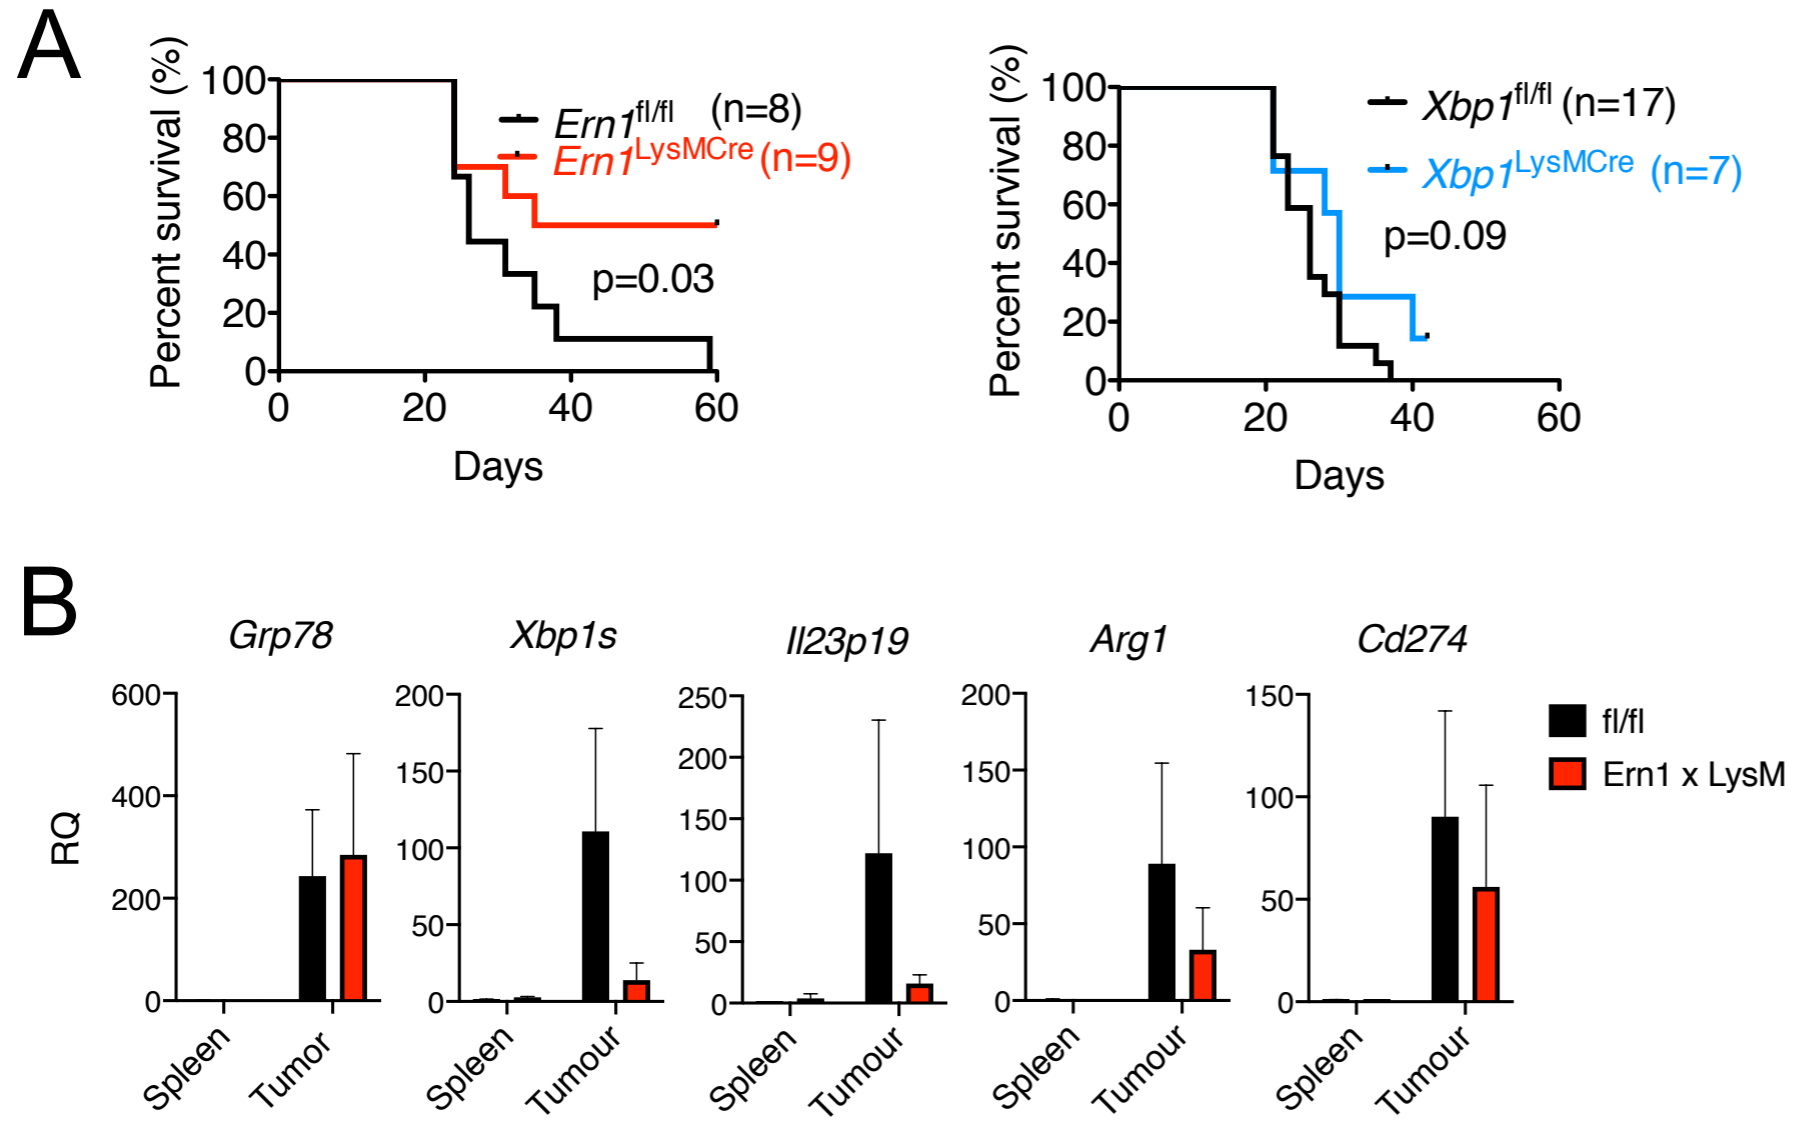

Fig 4.



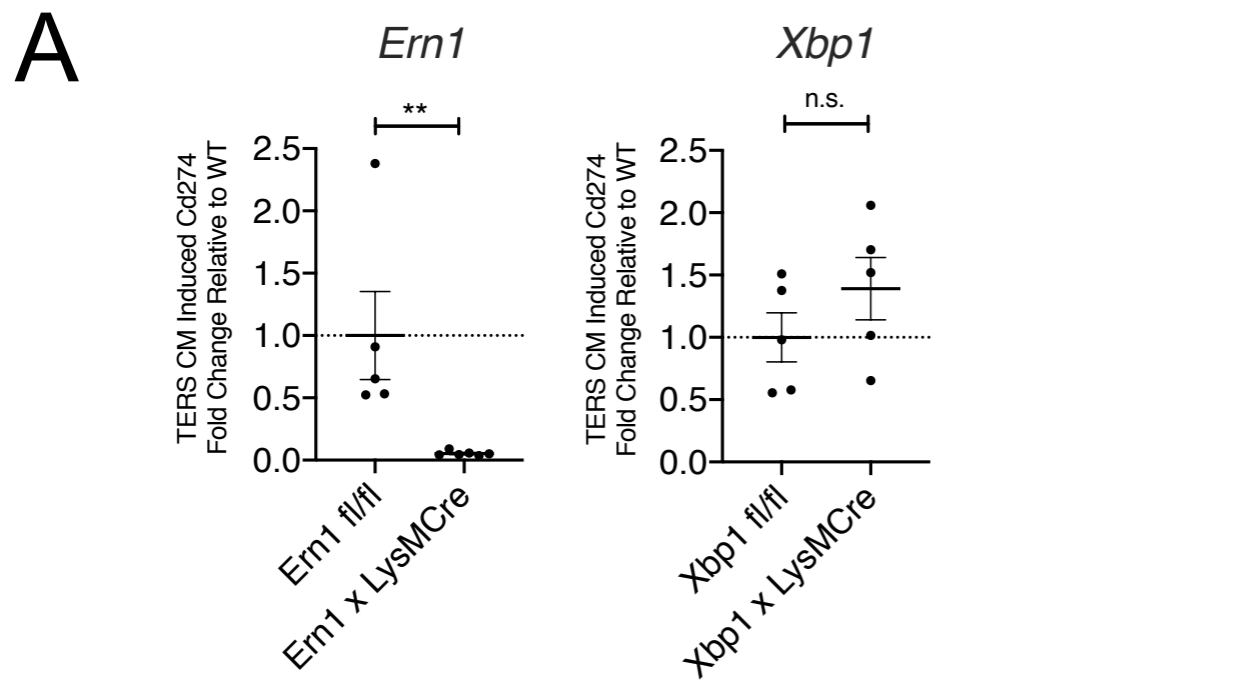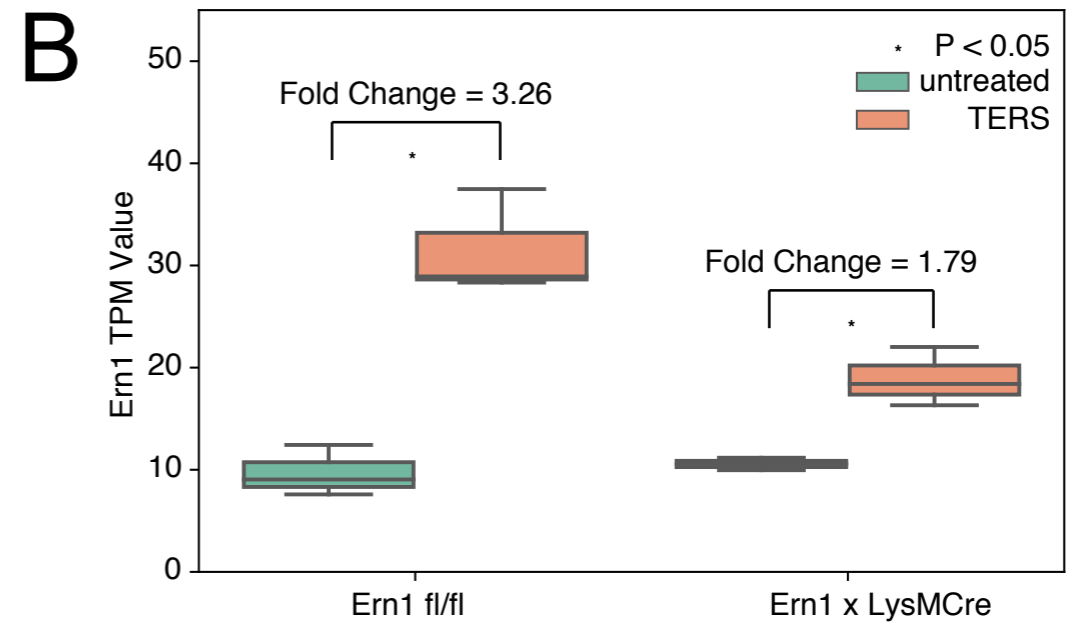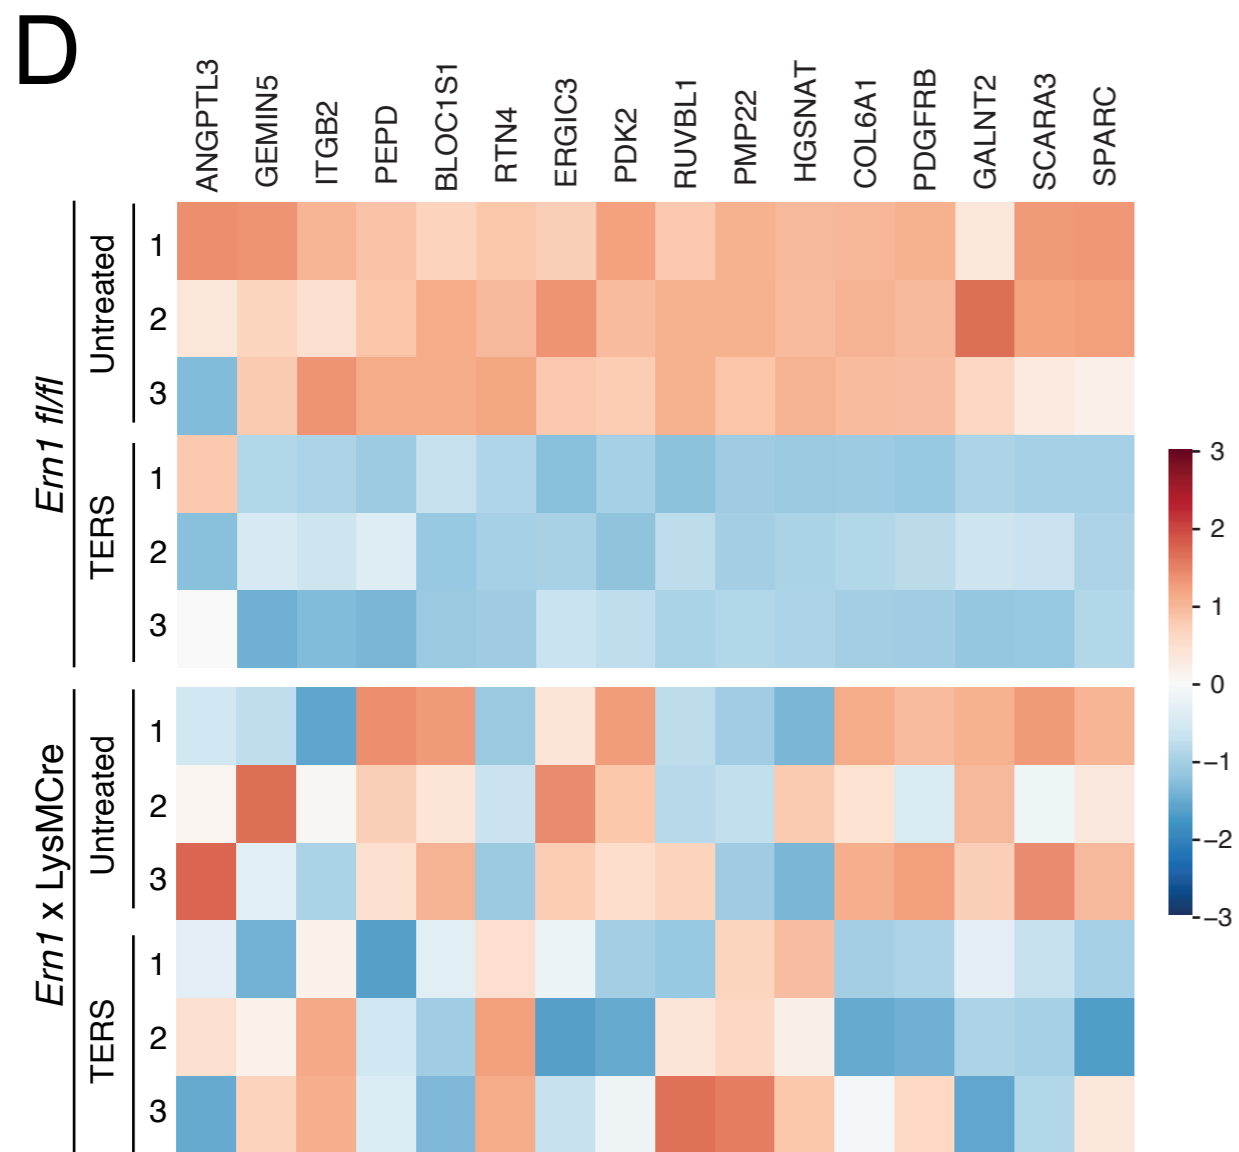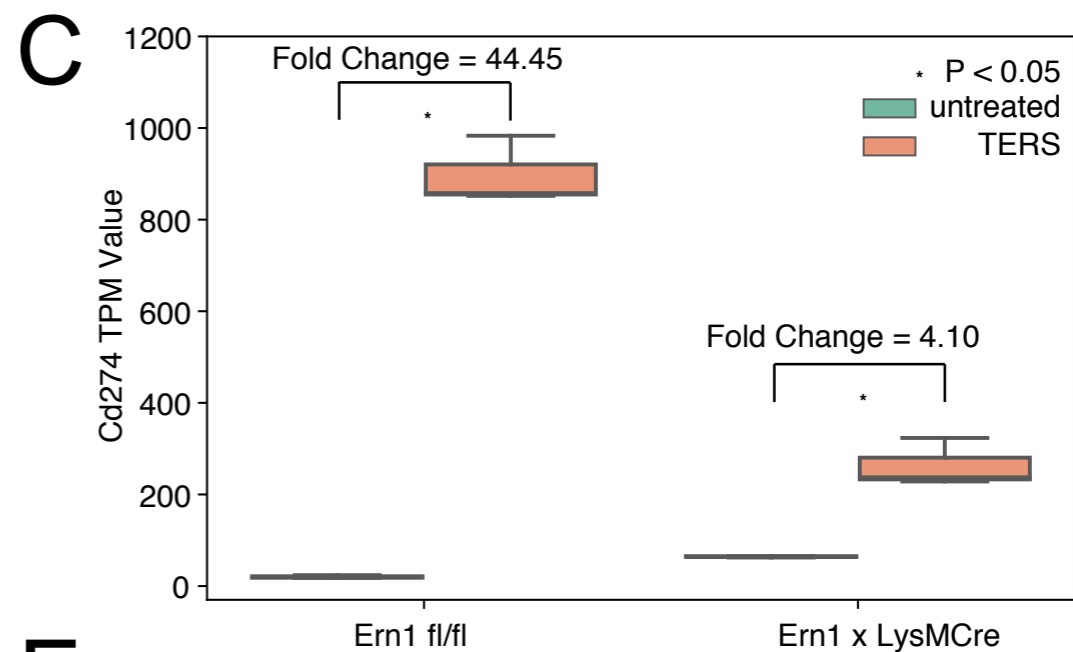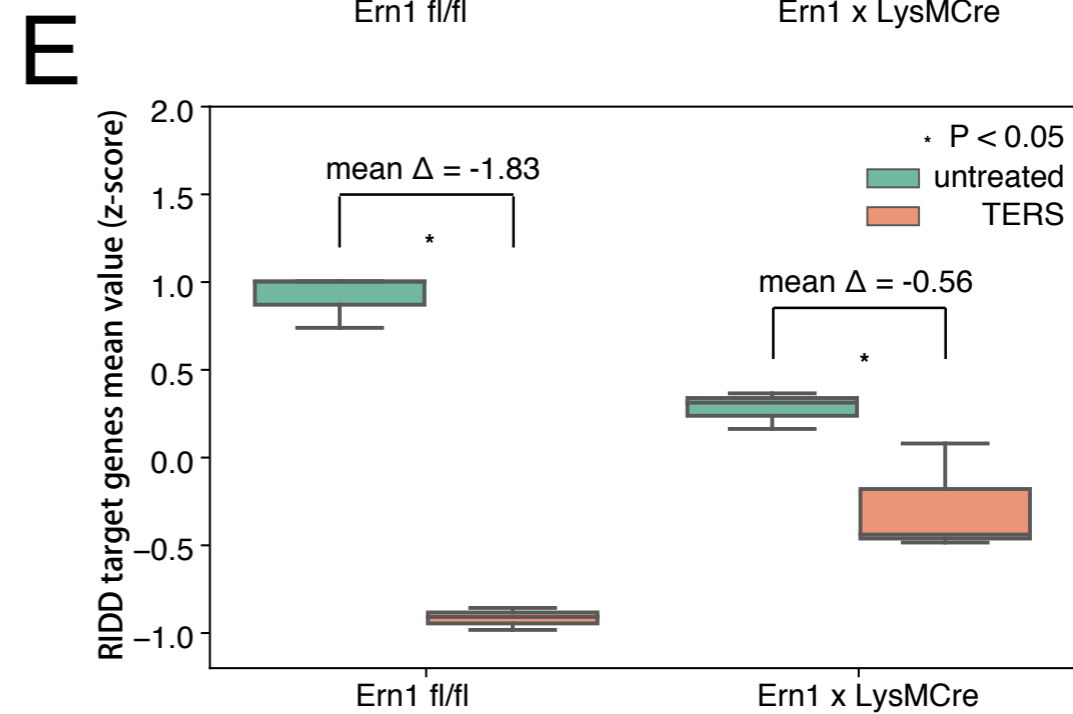

Fig 5.

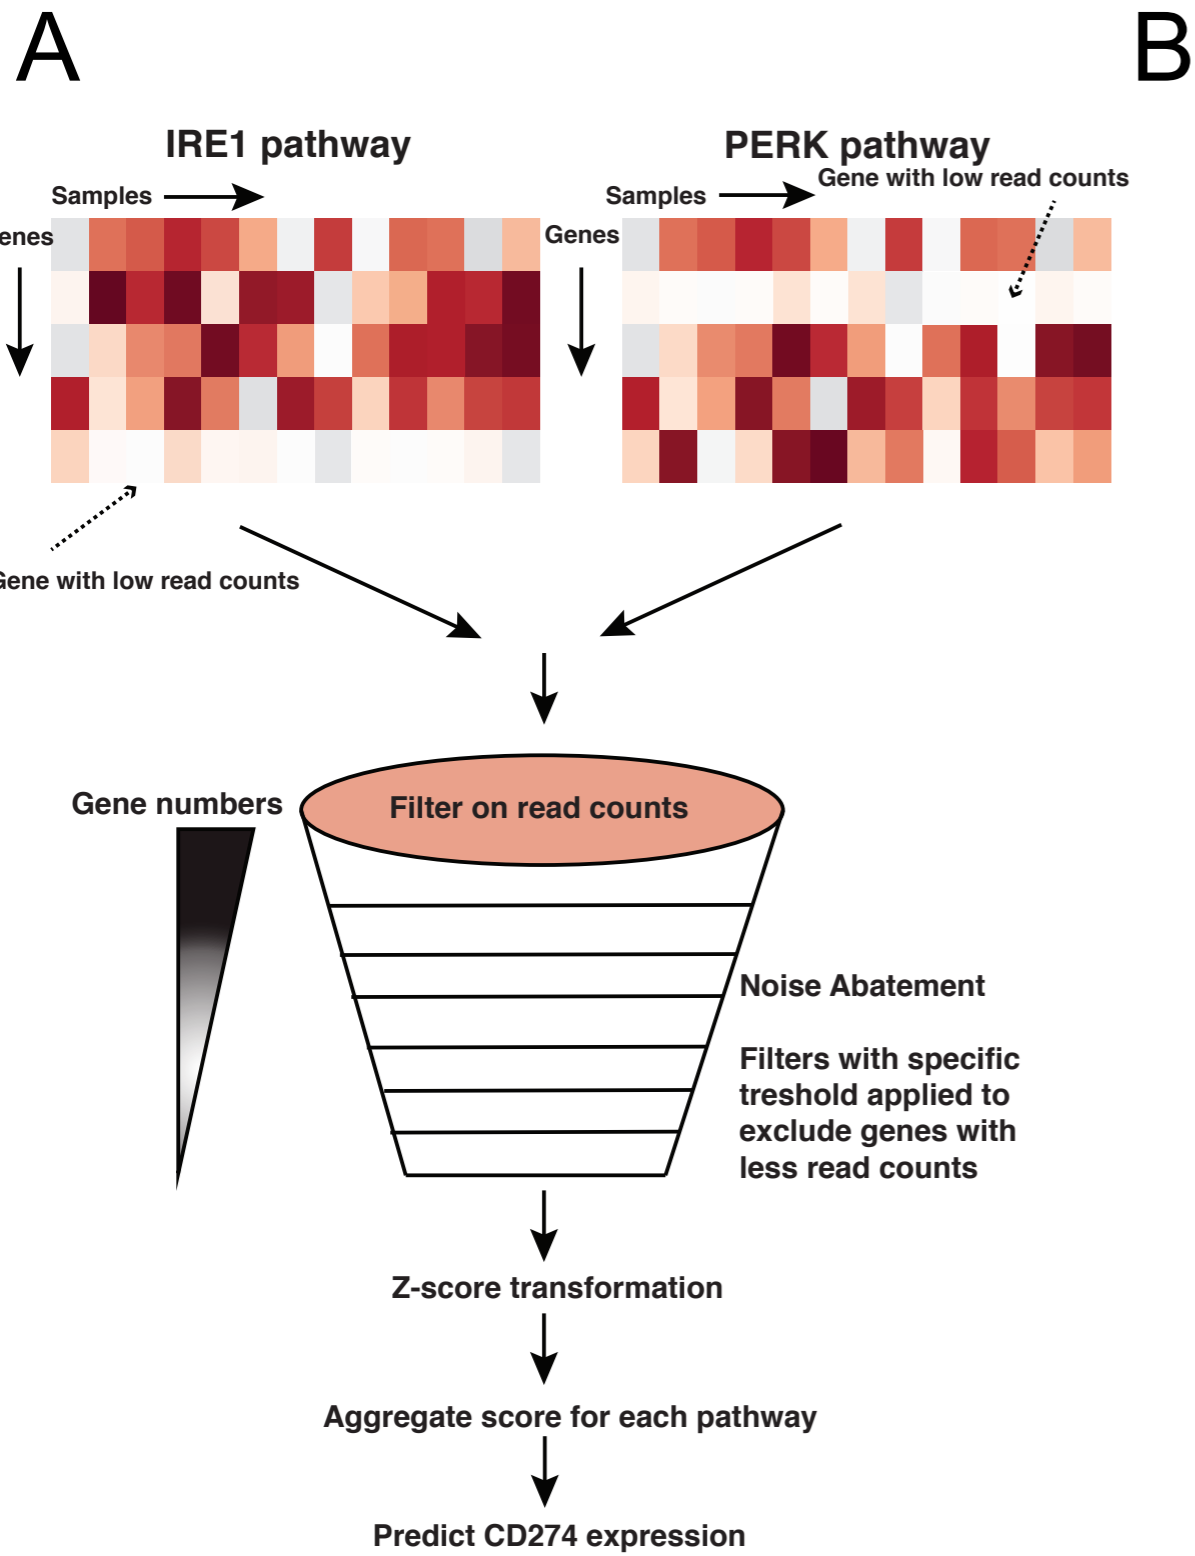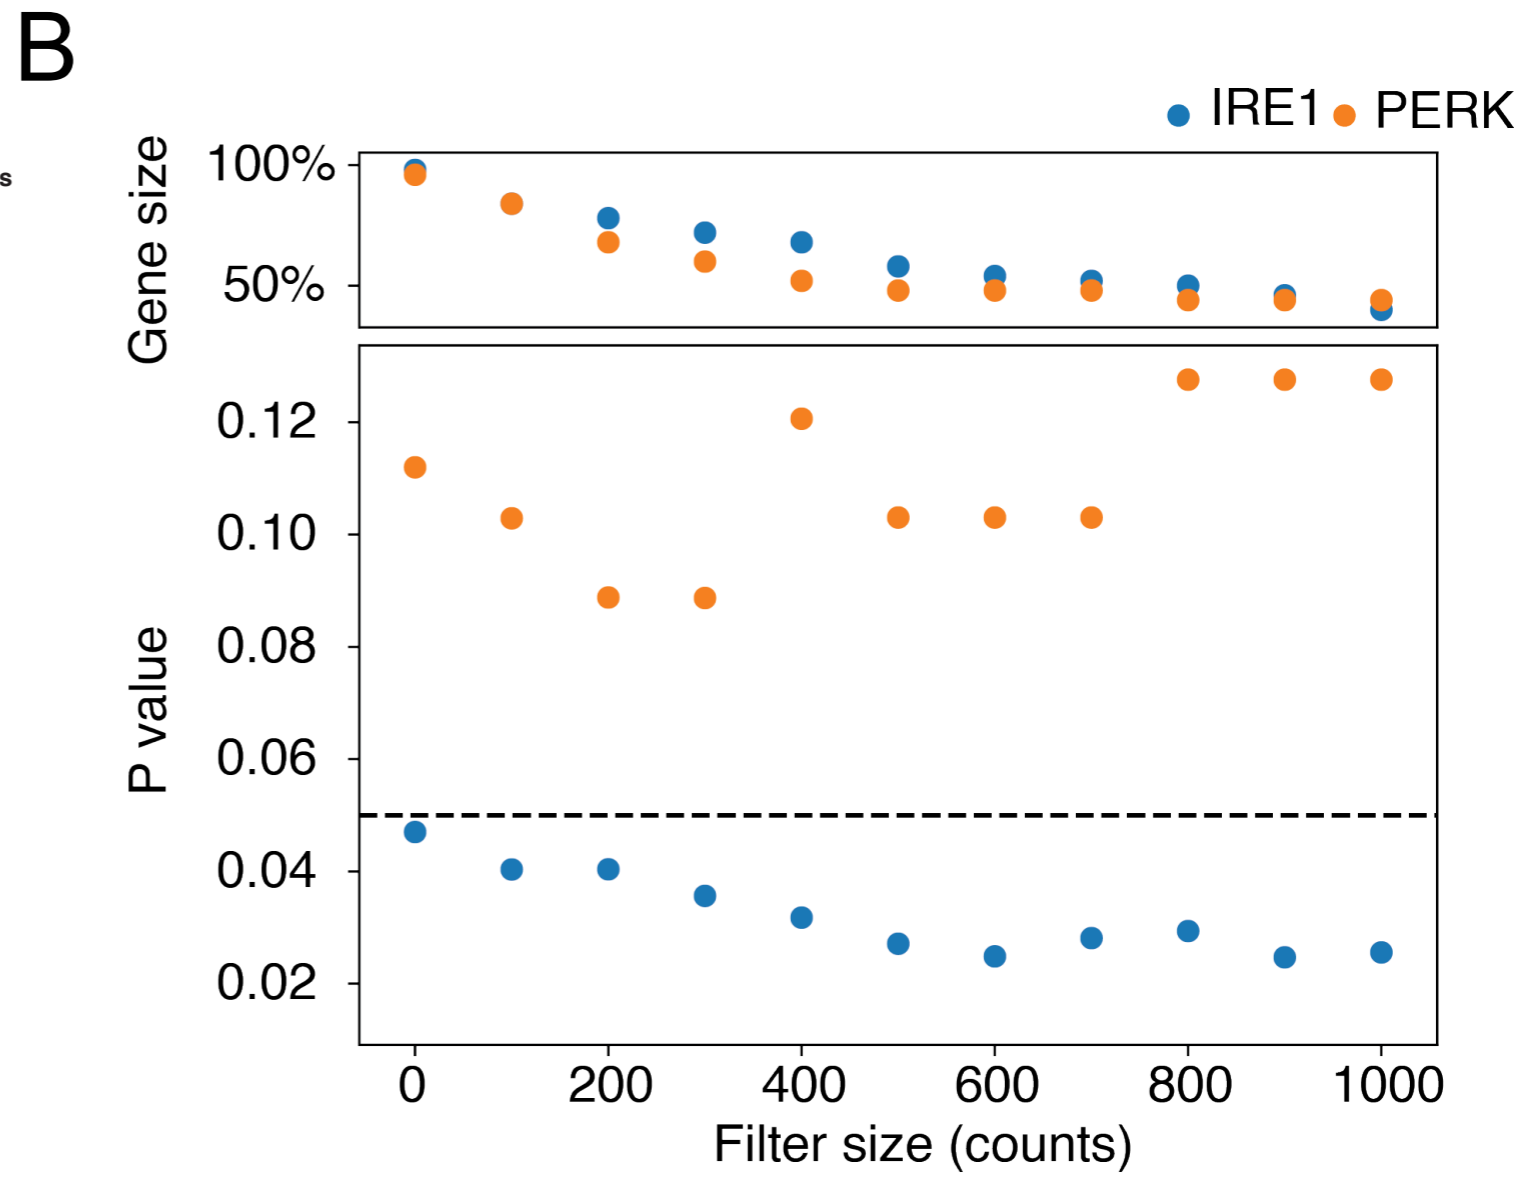

Fig 6.

|                    | coef            | pval           |
|--------------------|-----------------|----------------|
| Intercept          | 0.5681224413    | 0.6307185602   |
| BLCA               | 3.730781629     | 0.00291005966  |
| BRCA               | -0.281147938    | 0.8147005789   |
| CESC               | 6.893379114     | 8.34E-08       |
| CHOL               | 0.4014684074    | 0.8413656853   |
| COAD               | 0.5300701923    | 0.6672164335   |
| DLBC               | 20.84235676     | 8.08E-29       |
| ESCA               | 3.017860087     | 0.03778129109  |
| GBM                | -0.5684440601   | 0.6883179244   |
| HNSC               | 5.61635157      | 5.51E-06       |
| KICH               | 5.178474502     | 0.0023769321   |
| KIRC               | -0.3455225035   | 0.7796198465   |
| KIRP               | 0.6659839637    | 0.6060961809   |
| LGG                | -0.639698116    | 0.6071139362   |
| LIHC               | -0.2908561171   | 0.8160364346   |
| LUAD               | 3.69555473      | 0.00272696993  |
| LUSC               | 6.865457981     | 3.49E-08       |
| MESO               | 1.141219118     | 0.4692291251   |
| OV                 | -0.1591619966   | 0.9007001625   |
| PAAD               | -0.7801816419   | 0.5683066888   |
| PCPG               | 2.243029289     | 0.09976162006  |
| PRAD               | -0.1264243114   | 0.9190474856   |
| READ               | 0.3292890692    | 0.8124095707   |
| SARC               | -1.090528135    | 0.4092896389   |
| SKCM               | 0.8616842823    | 0.5776724443   |
| STAD               | 4.070734989     | 0.001469900349 |
| TGCT               | 0.872136964     | 0.5455941353   |
| THCA               | 2.317361301     | 0.06056962238  |
| THYM               | 13.04353041     | 4.96E-19       |
| UCEC               | -0.04793209811  | 0.9687882727   |
| UCS                | -0.5462166032   | 0.7546040883   |
| UVM                | 0.1250809139    | 0.9379339045   |
| ERN1.00            | -0.02639975541  | 0.3447808132   |
| gmeanMacro         | 0.04256029965   | 1.93E-07       |
| ERN1:gmeanMacro    | 0.001211494277  | 0.02397204832  |
| EIF2AK3            | -0.002925408763 | 0.8832796928   |
| EIF2AK3:gmeanMacro | 0.0007820854511 | 0.1550669885   |

Table 1.
